# Supplementary material
Source: HighWire-hosted journal article supplement (https://gut.bmj.com/content/72/2/275)
Supplement: inline-supplementary-material-2 [file inline-supplementary-material-2.pdf]

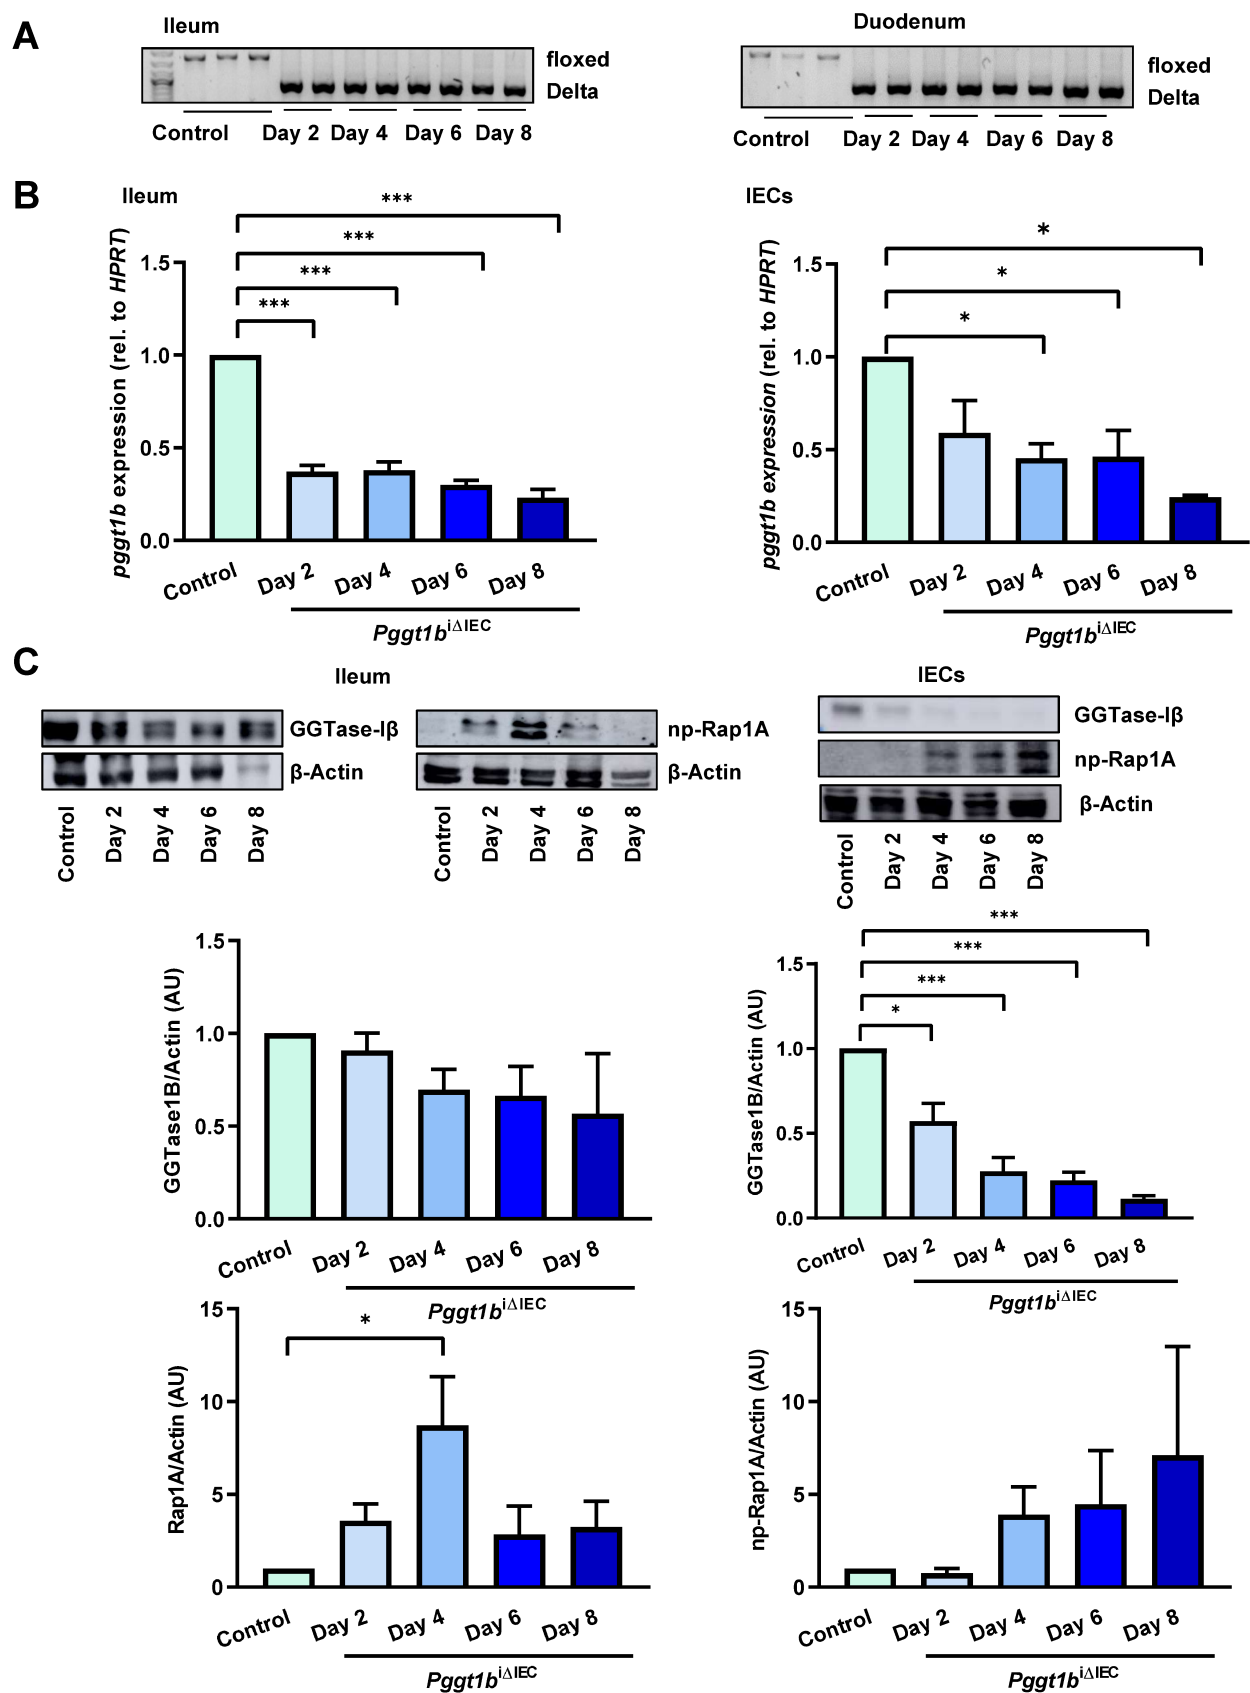

Suppl. Figure 1: Time-dependent generation of GGTase conditoinal KO mice

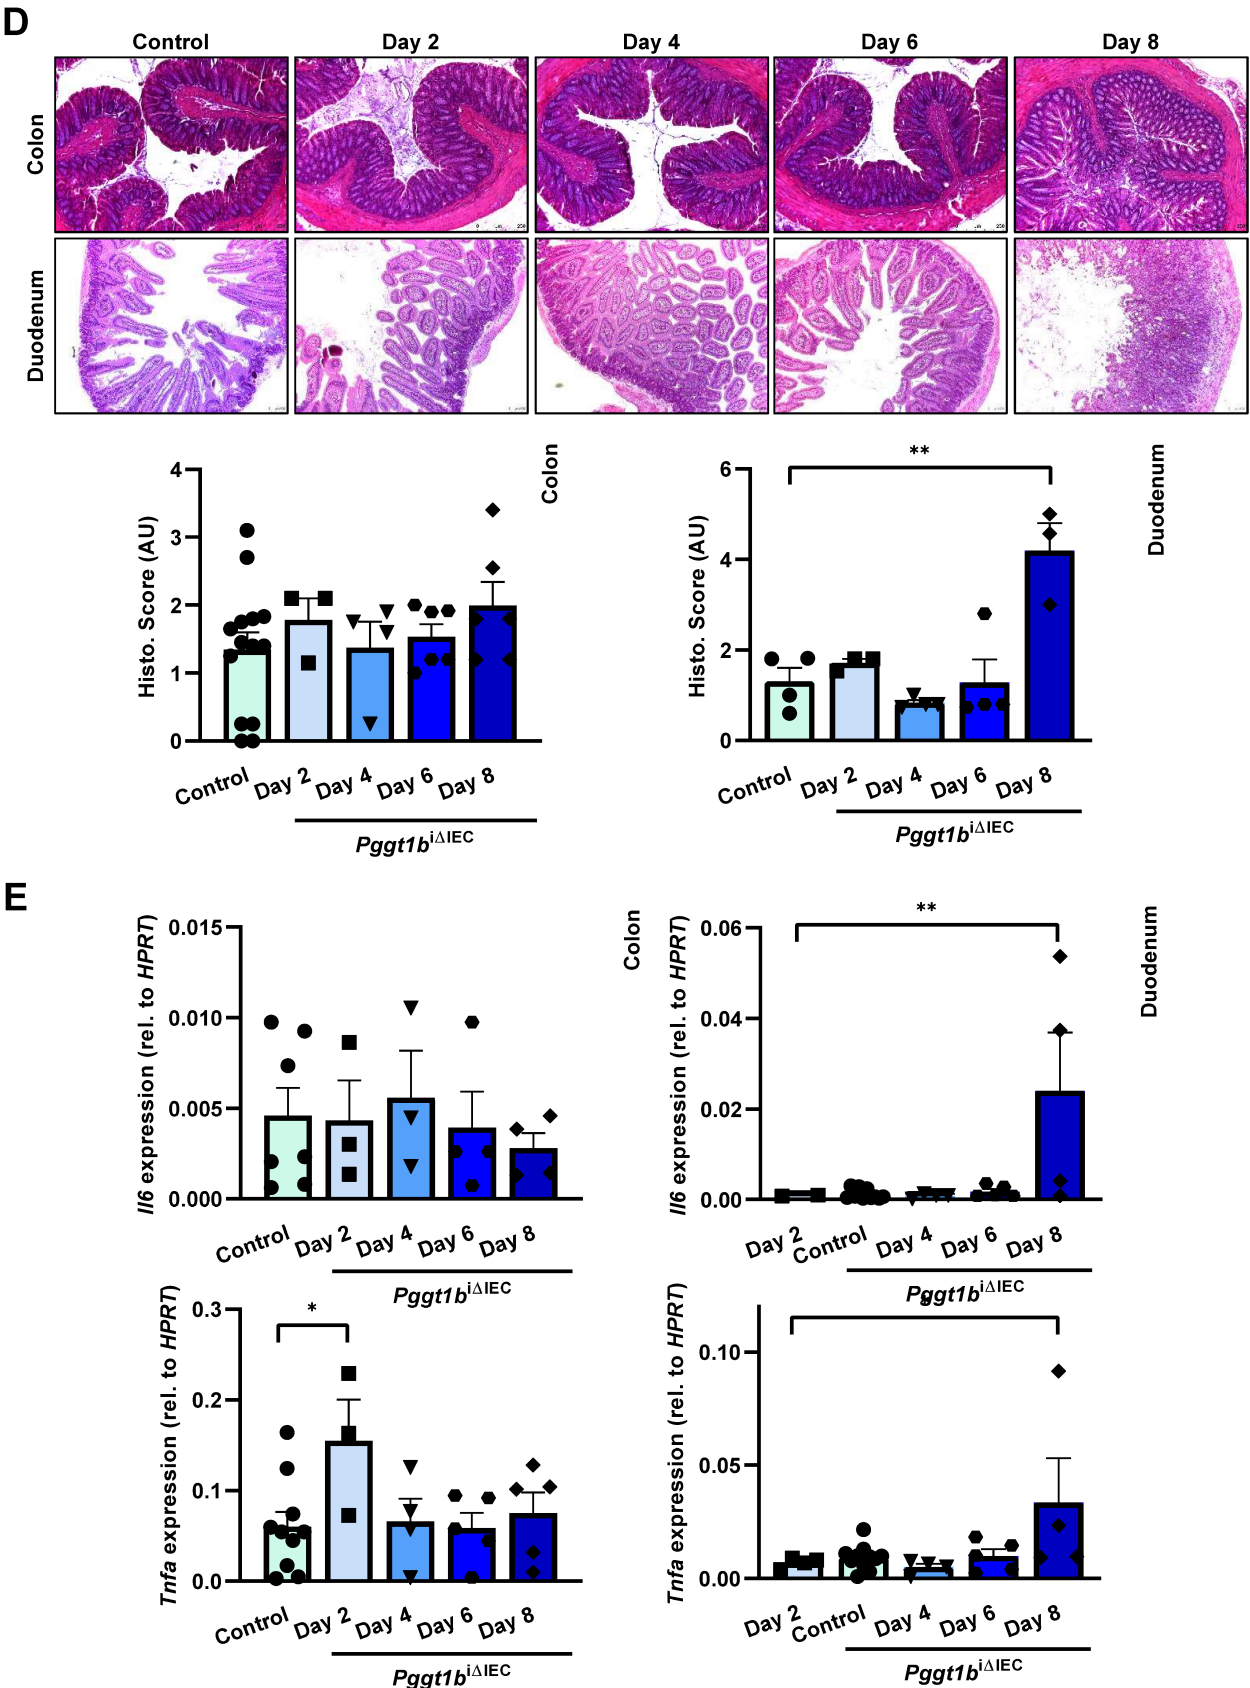

Suppl. Figure 1: Time-dependent generation of GGase conditional KO mice



F

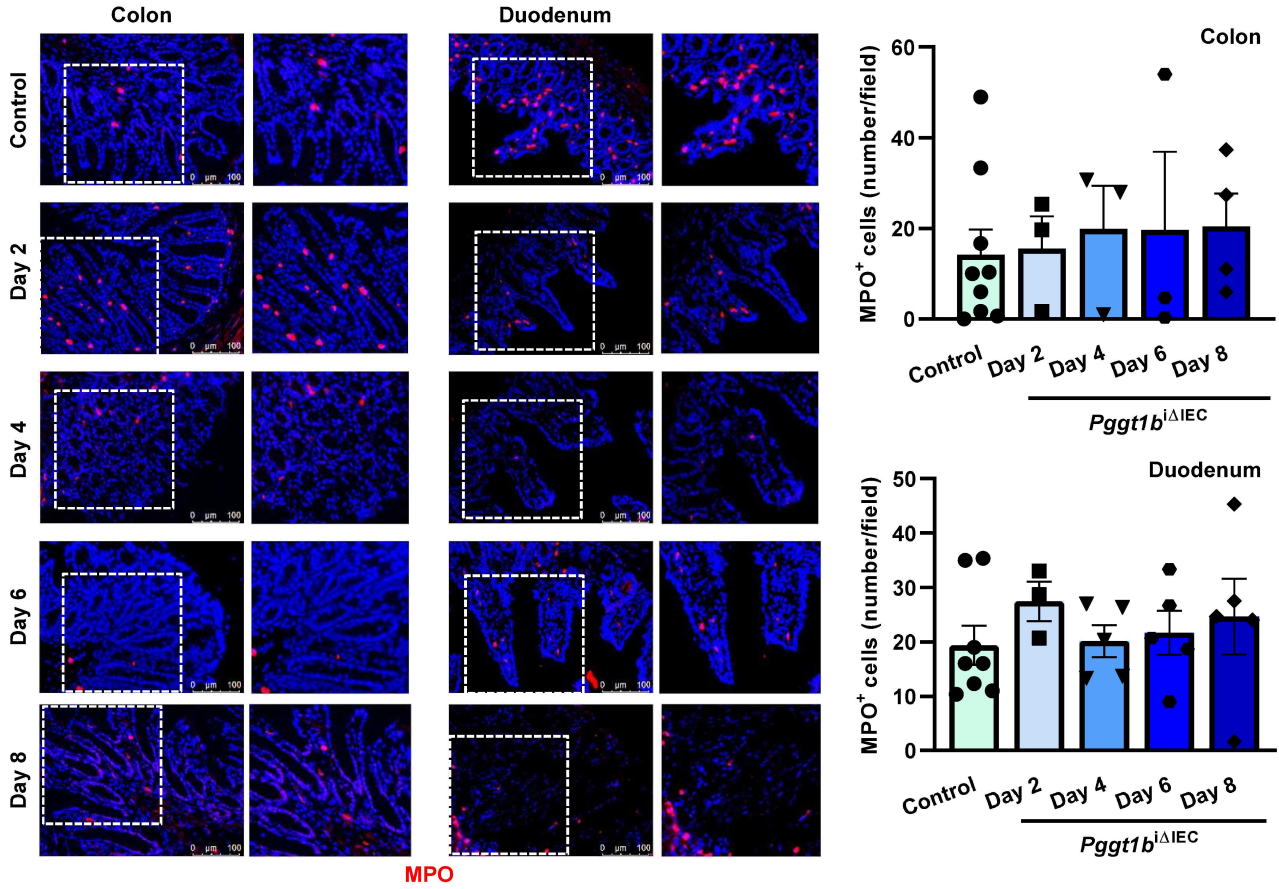

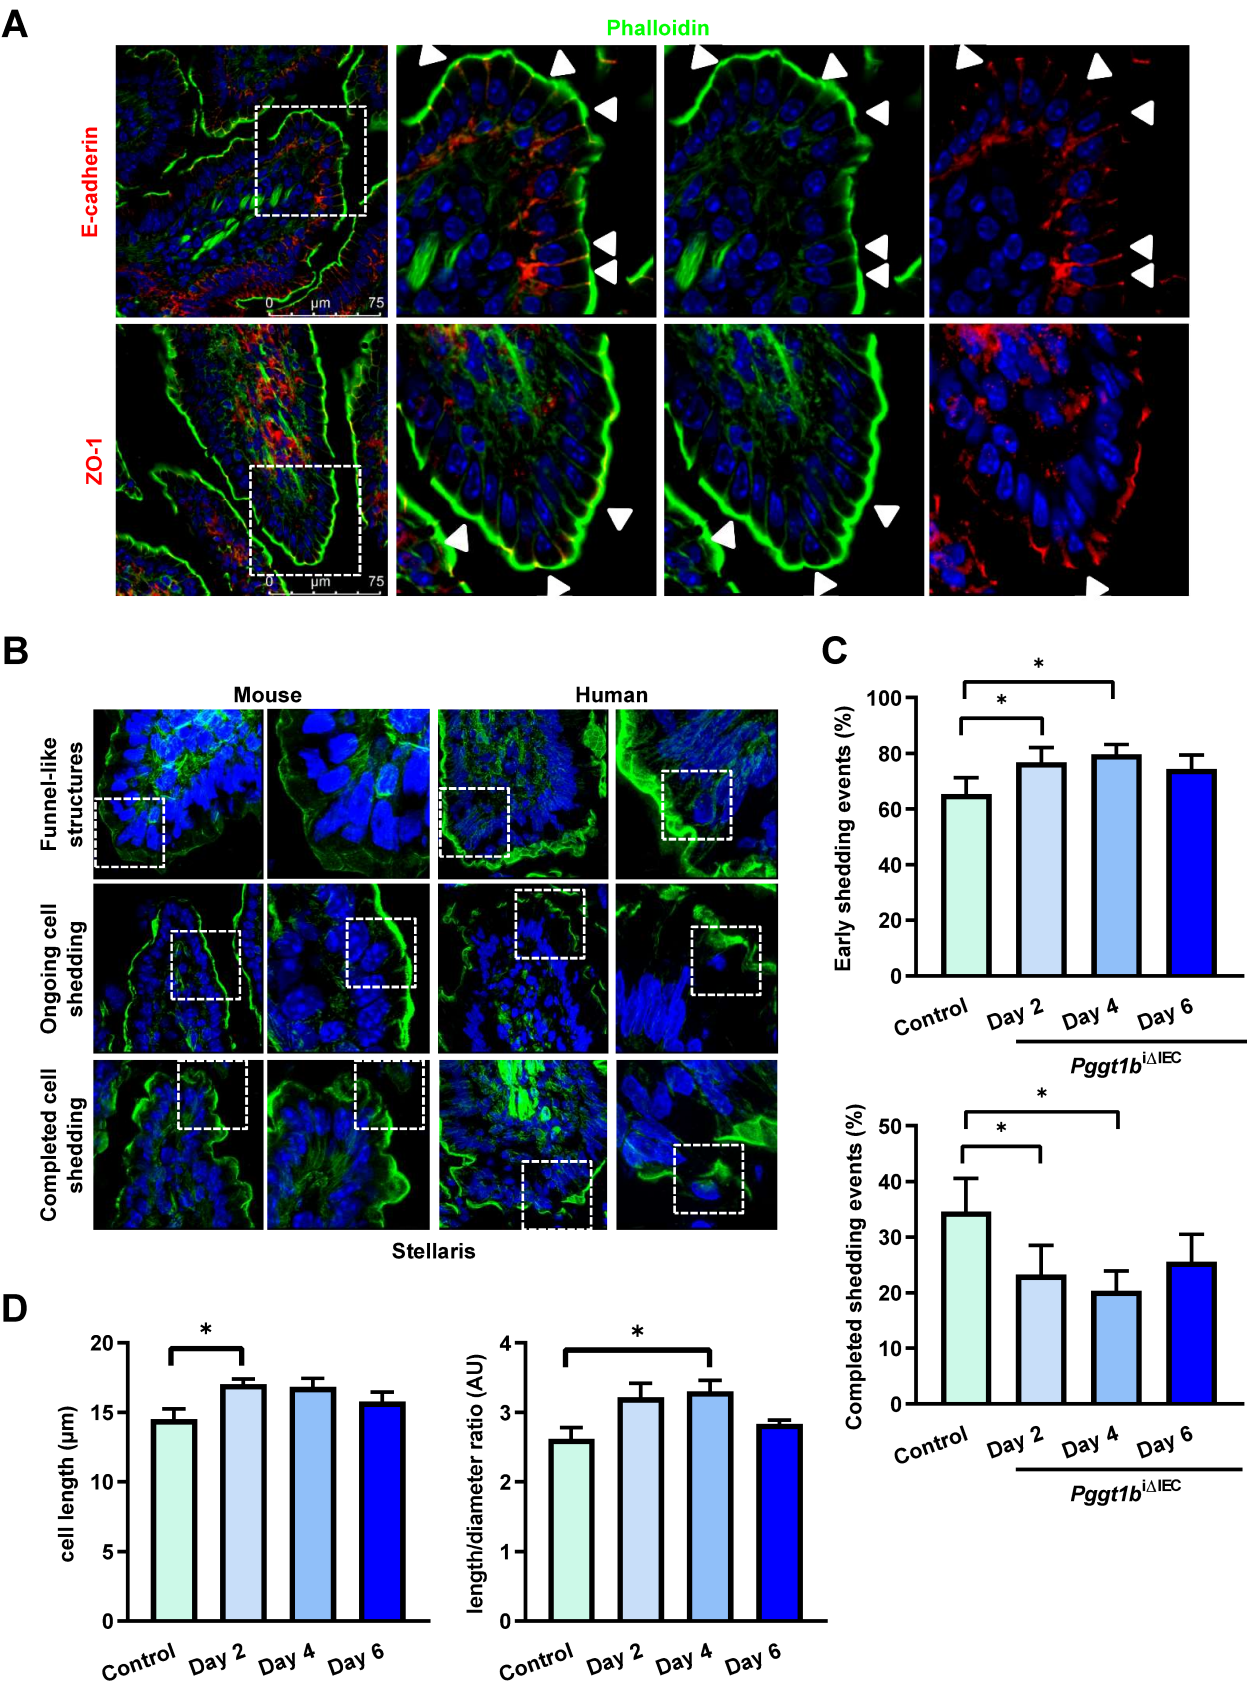

Suppl. Figure 2: Cell shedding alterations

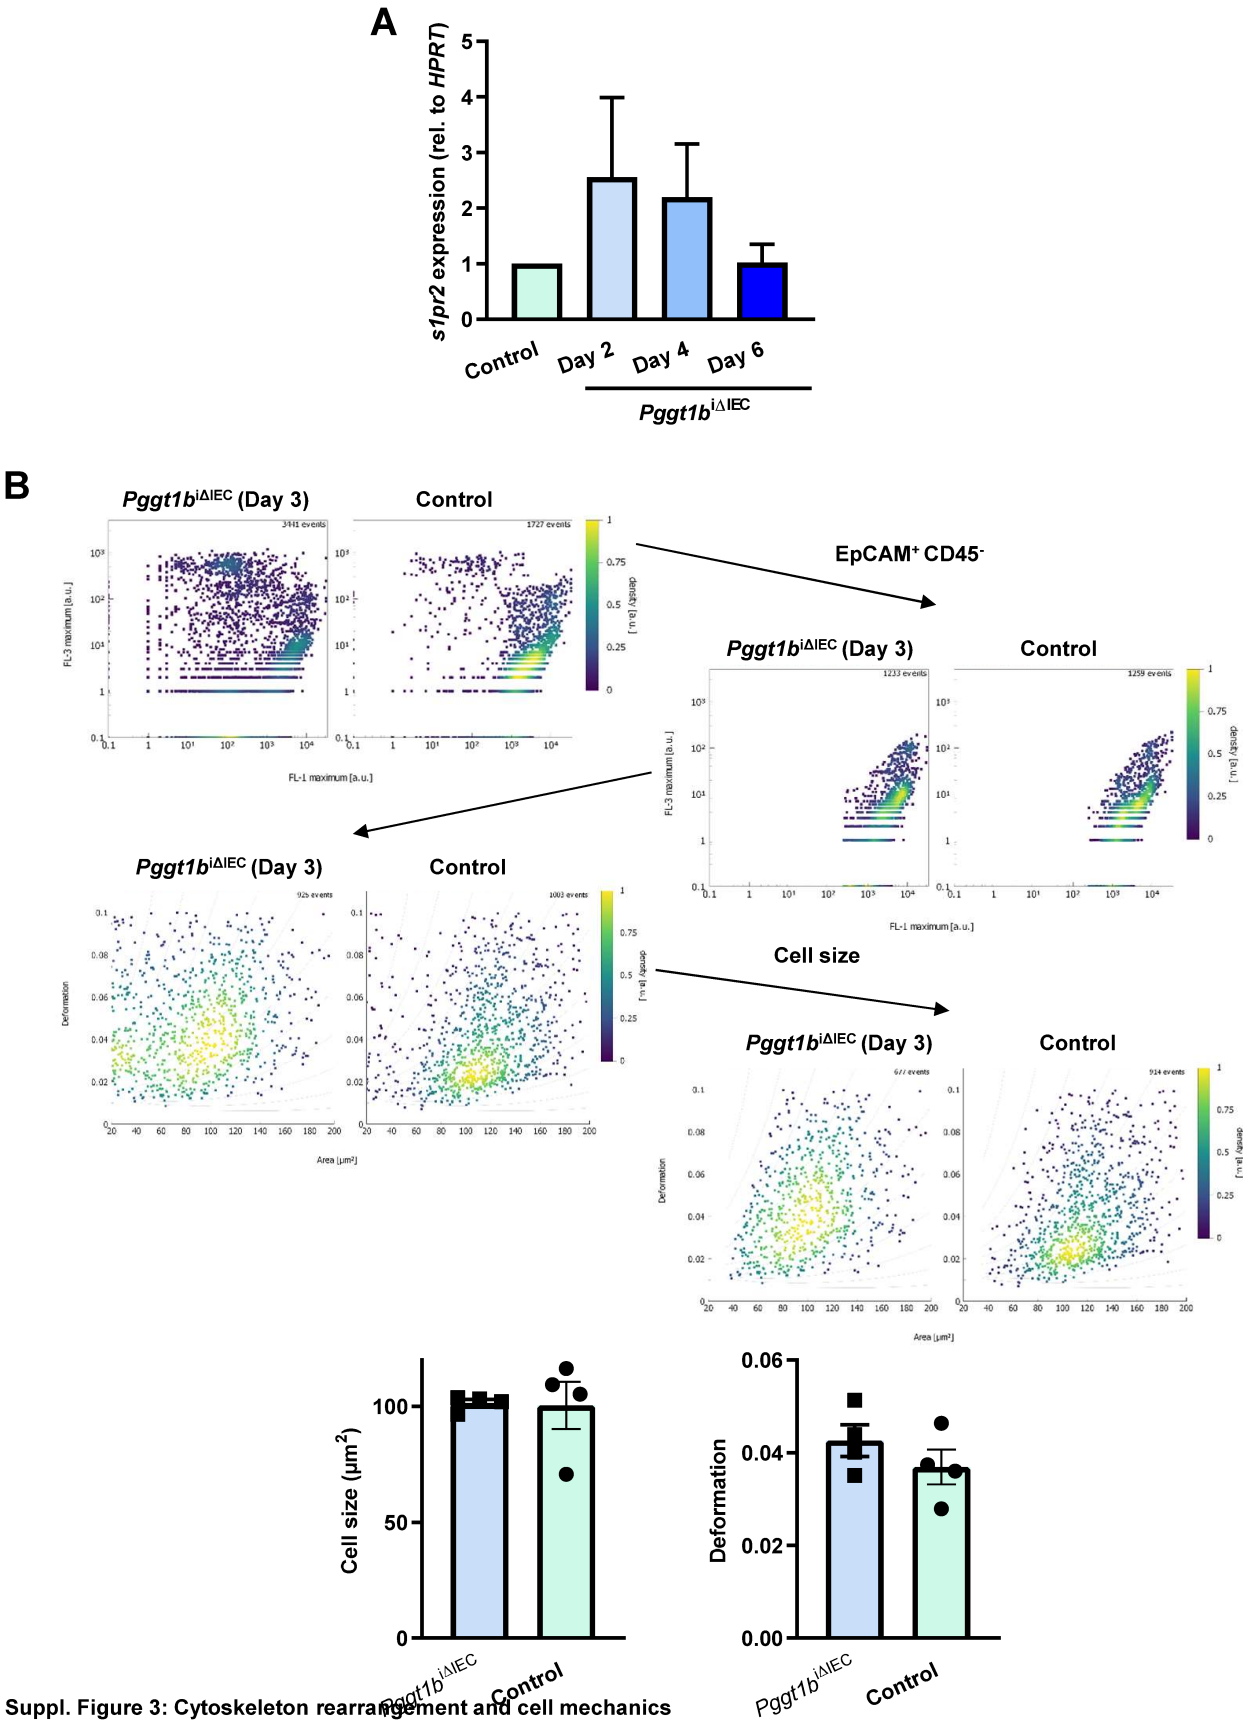

Suppl. Figure 3: Cytoskeleton rearrangement and cell mechanics

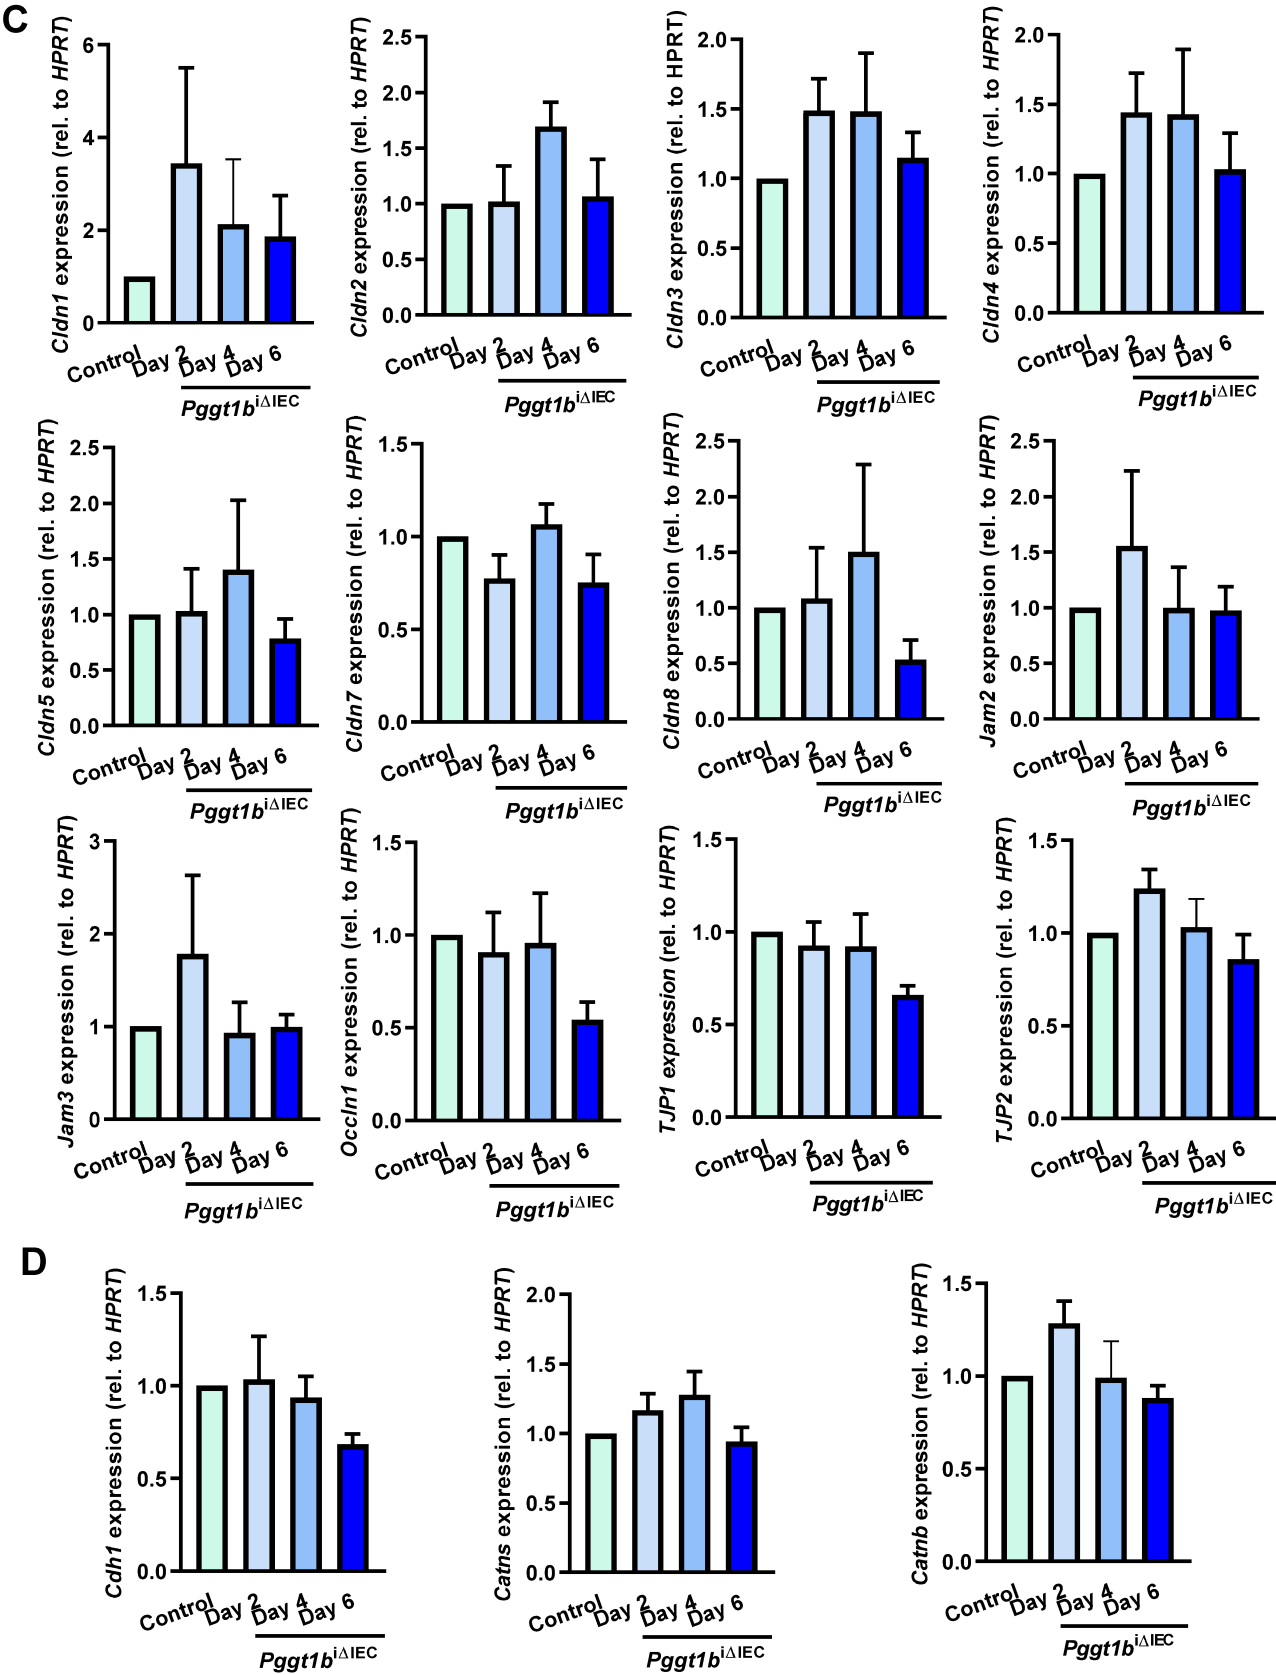

Suppl. Figure 3: Cytoskeleton rearrangement and cell mechanics

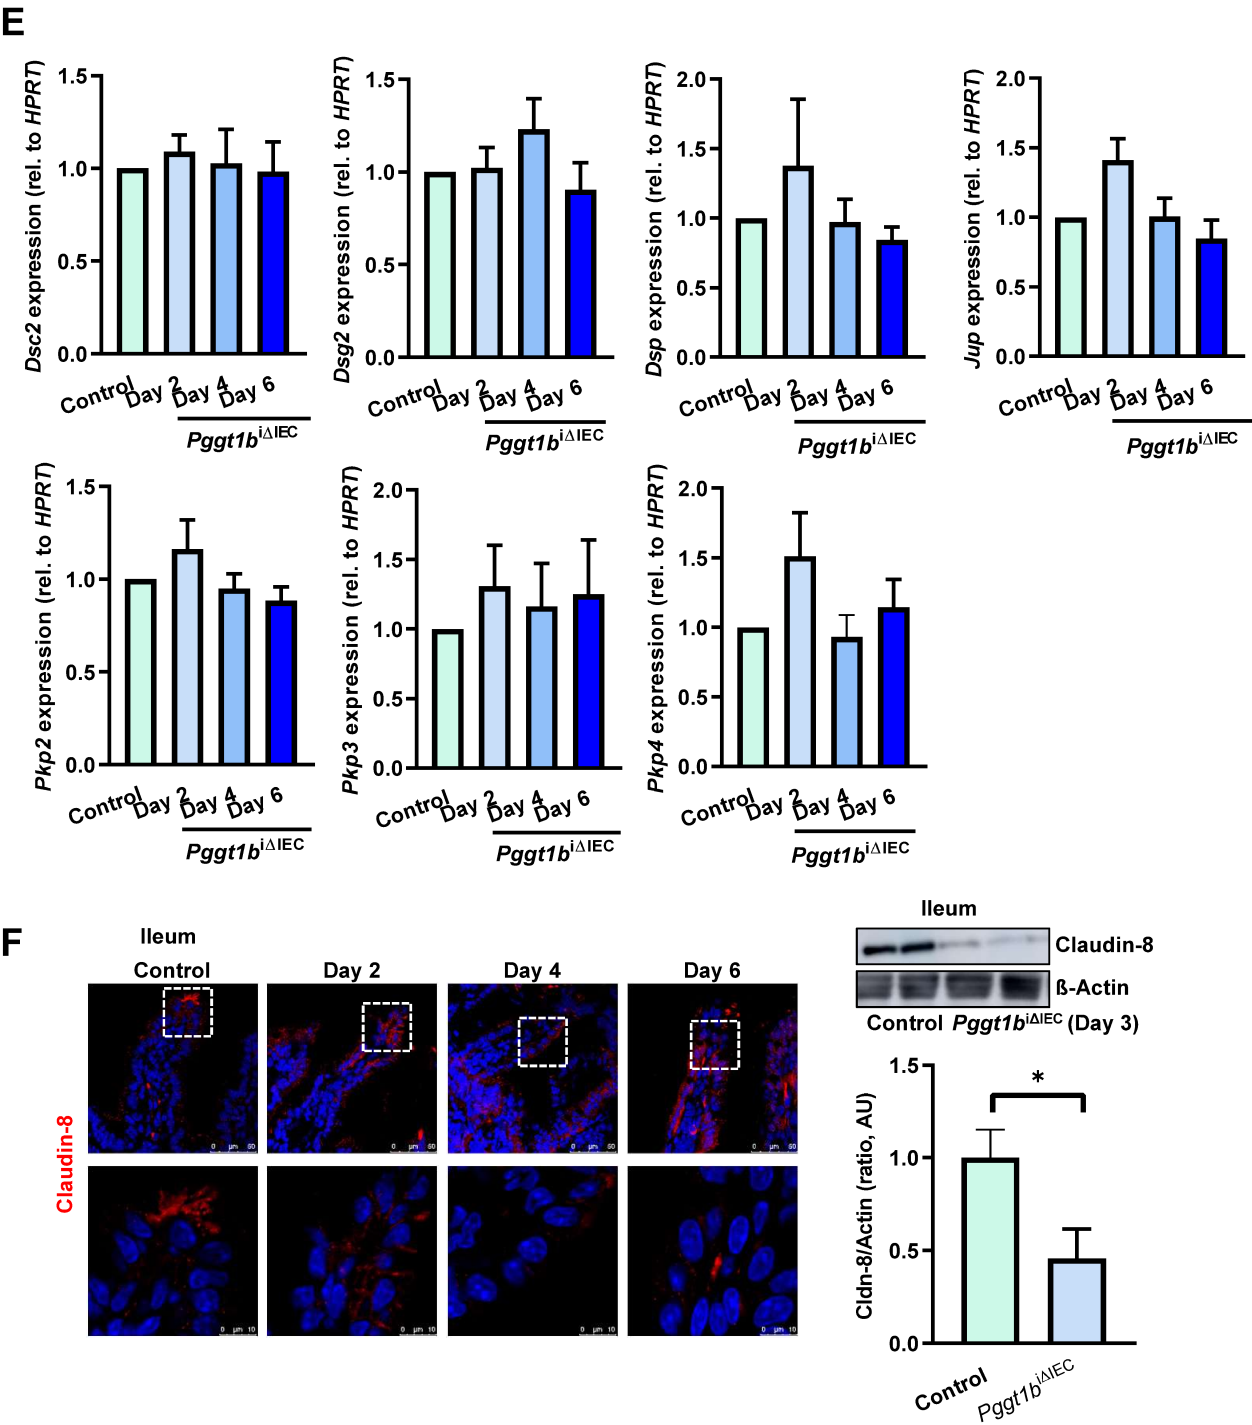

Suppl. Figure 3: Cytoskeleton rearrangement and cell mechanics



G

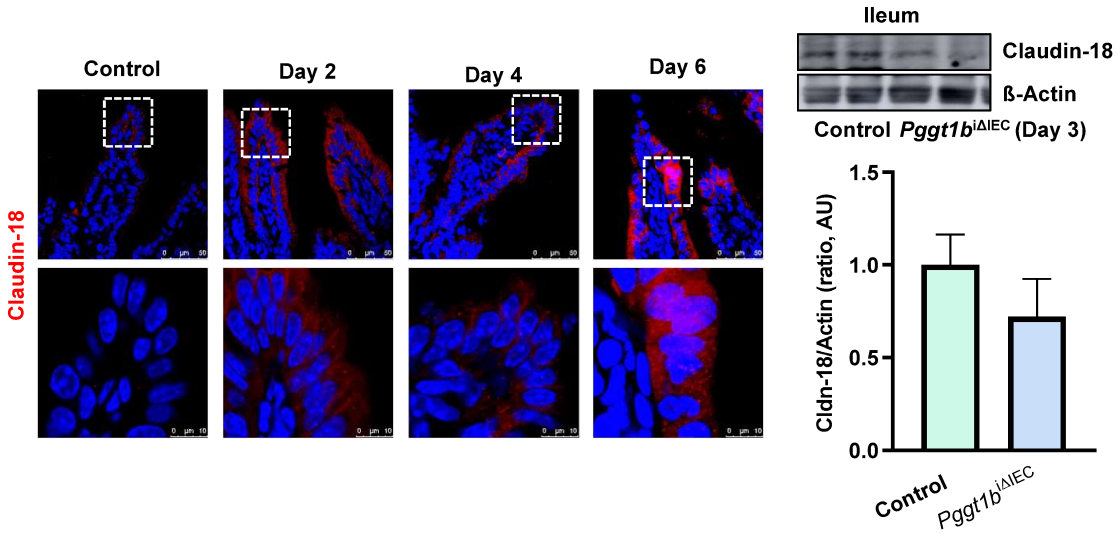

H

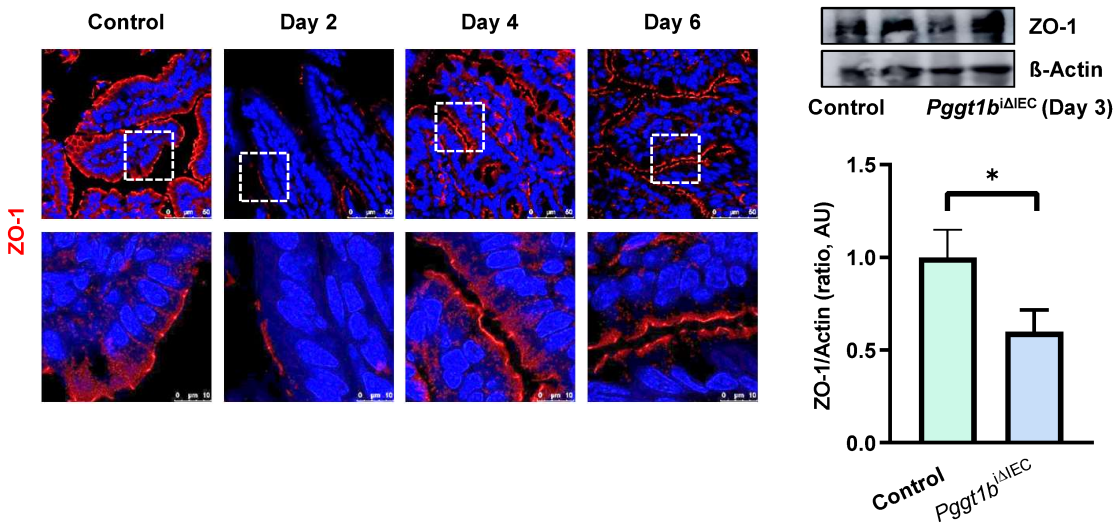

I

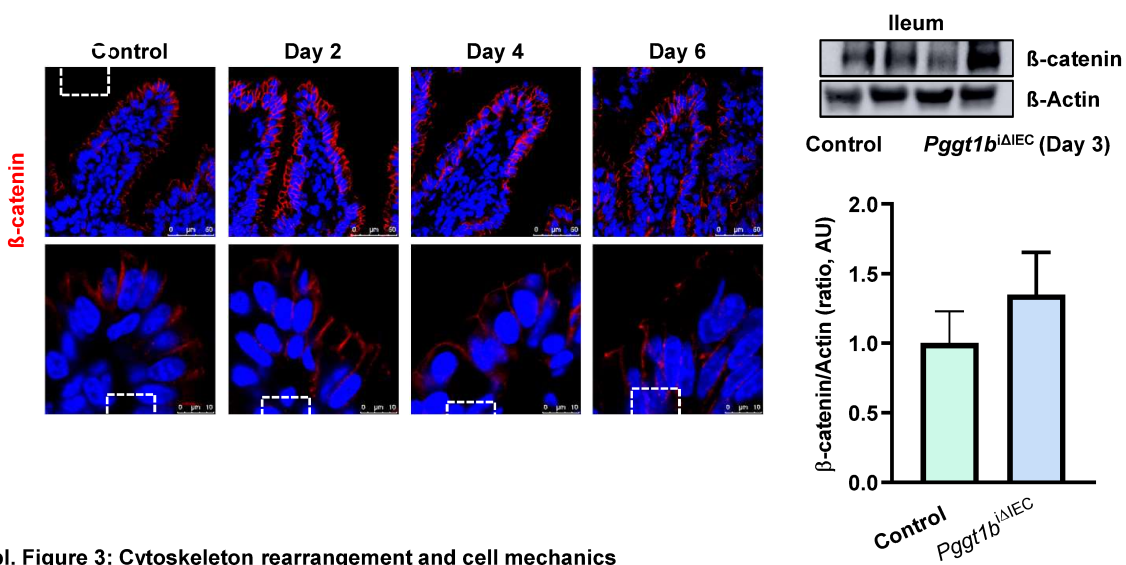

Suppl. Figure 3: Cytoskeleton rearrangement and cell mechanics

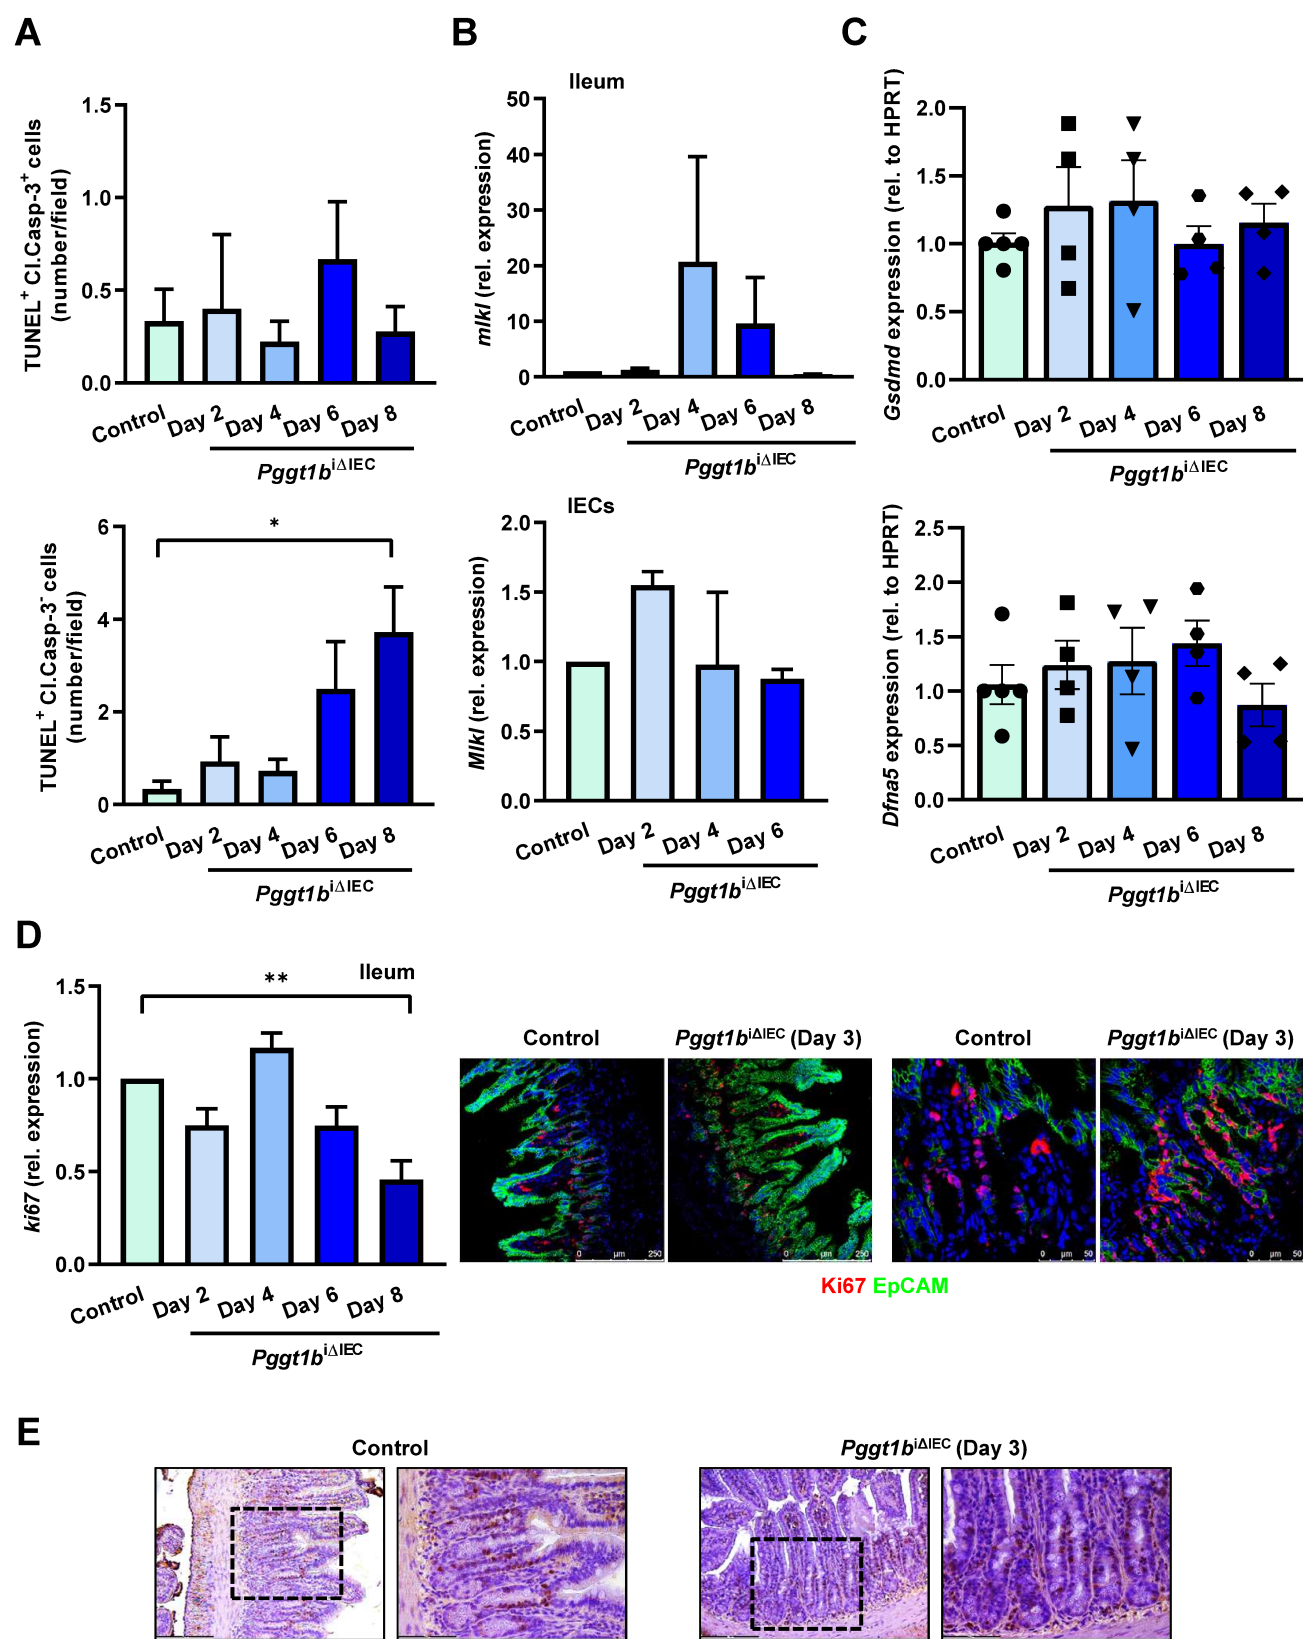

Suppl. Figure 4: Alternative molecular mechanisms in GGTase conditional KO mice

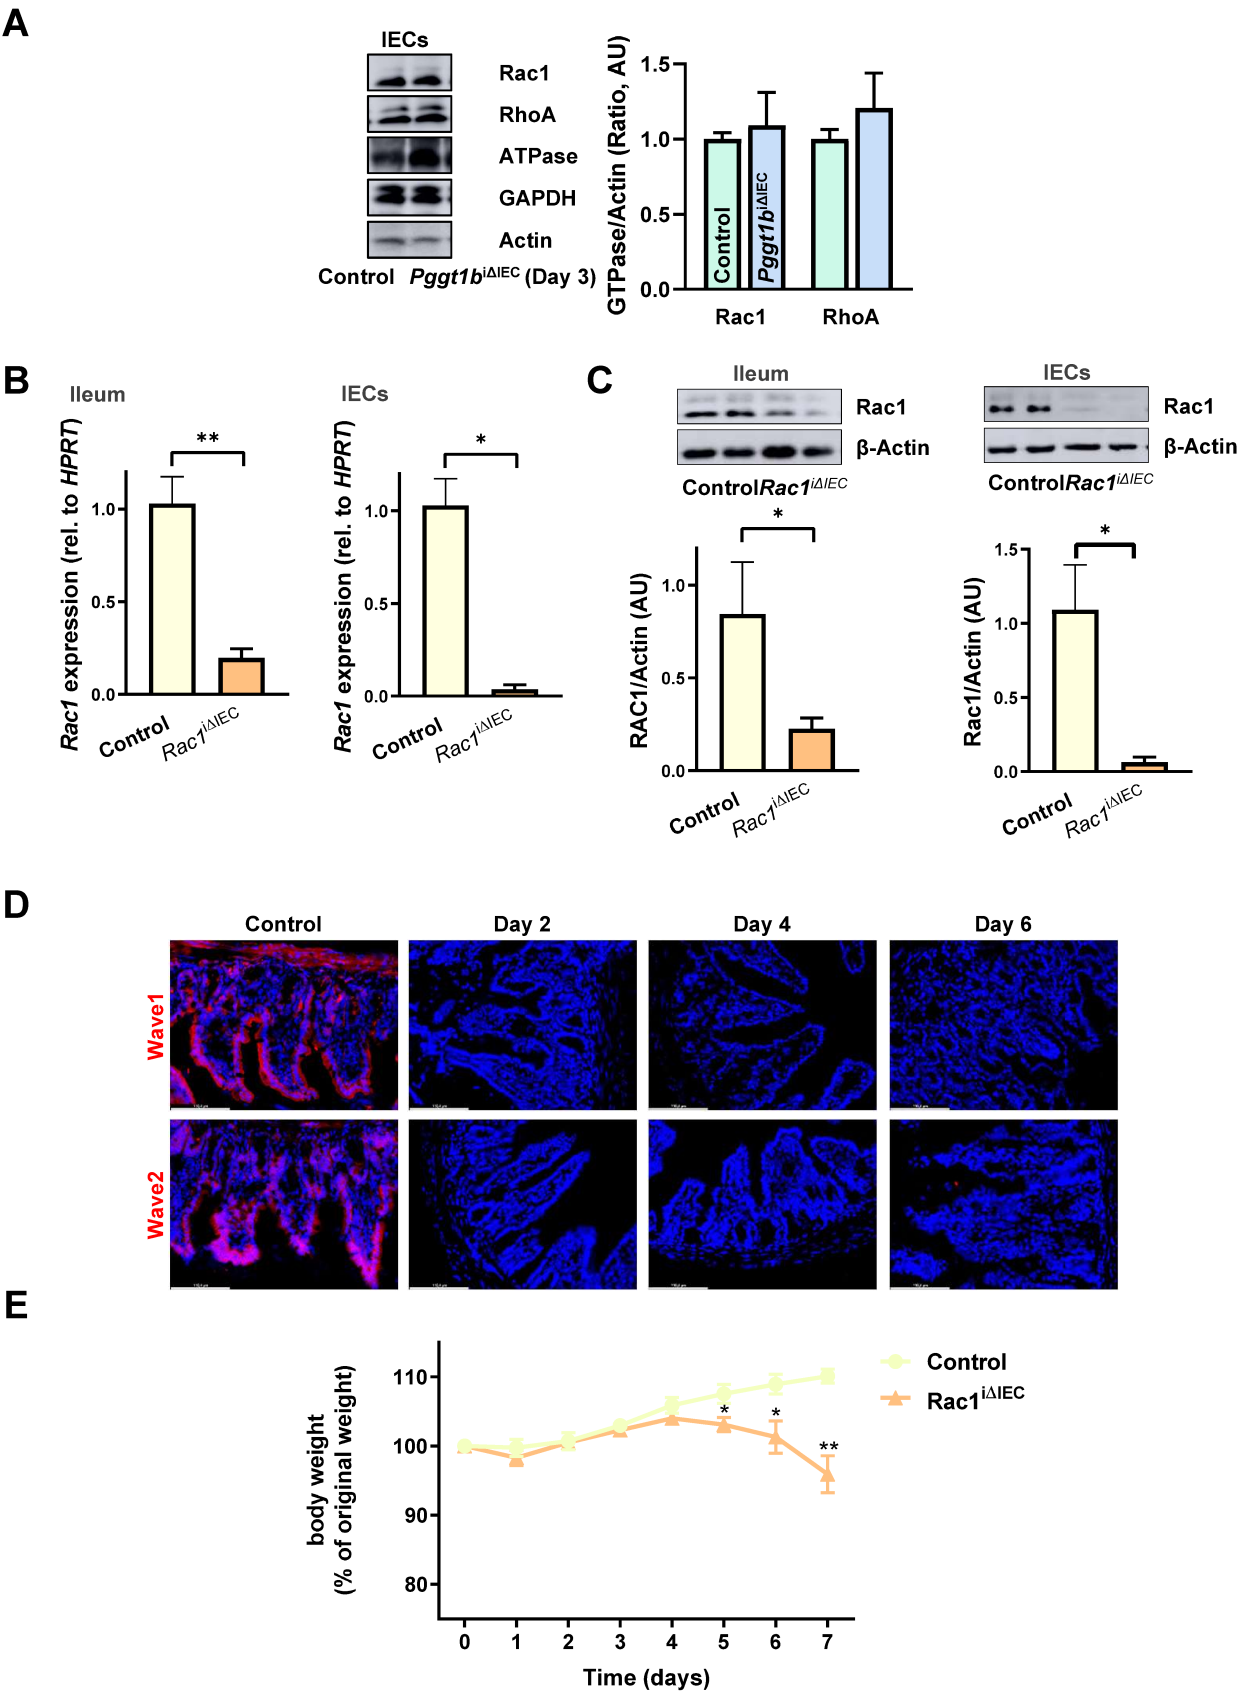

Suppl. Fig. 5: Rac1 conditional knock-out mice

F

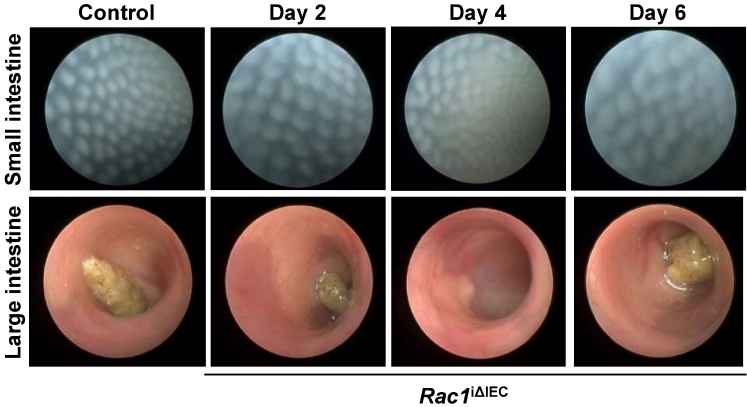

G

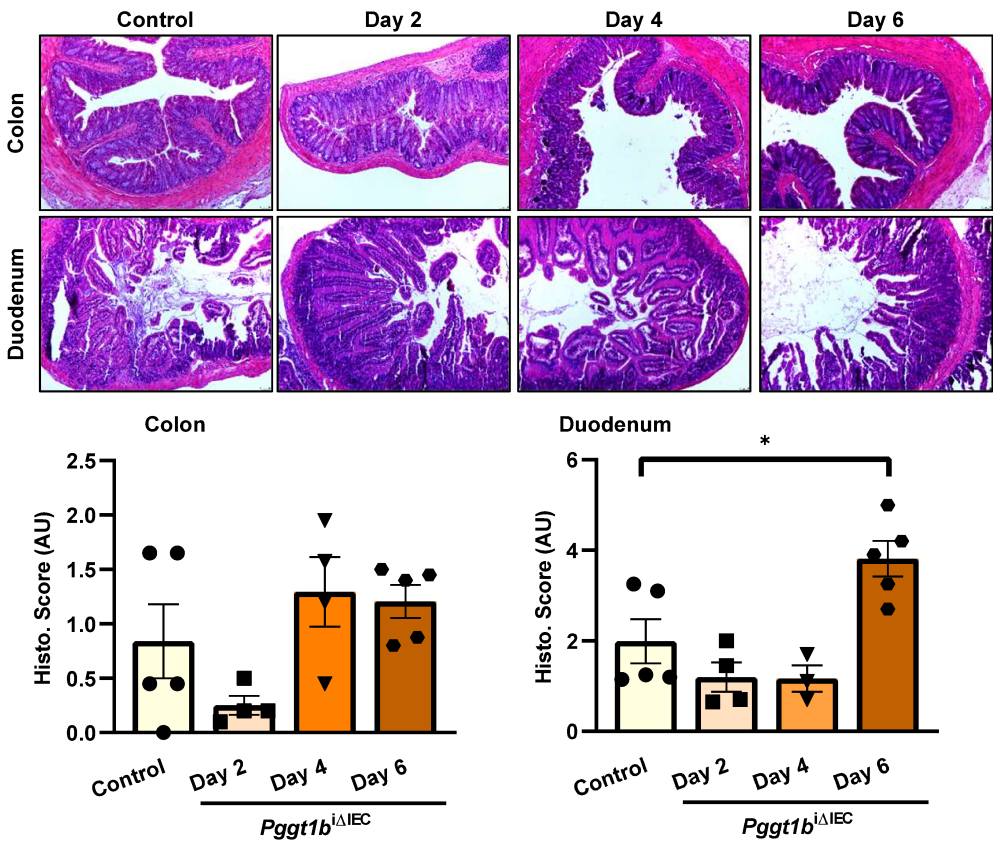

H

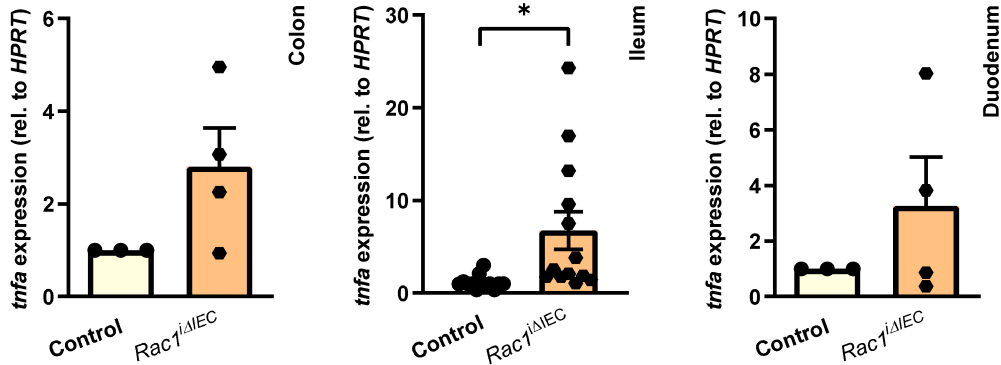

Suppl. Fig. 5: *Rac1* conditional knock-out mice



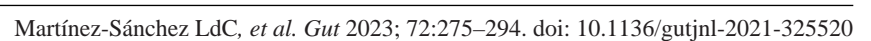



M

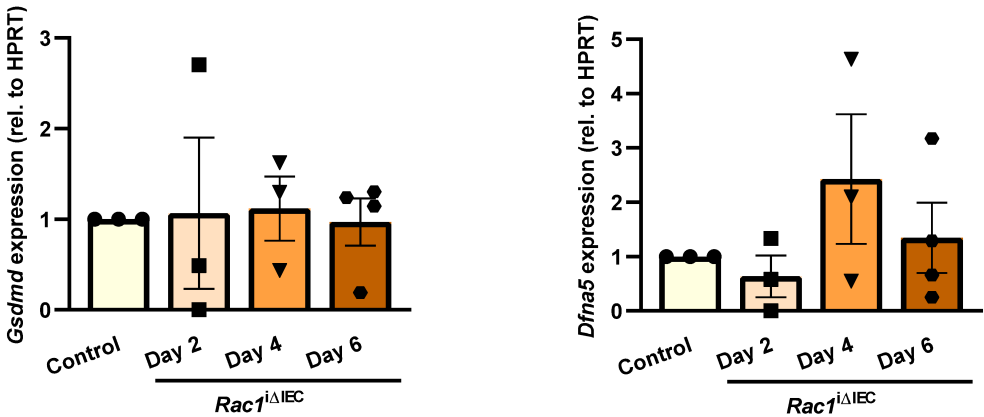

N

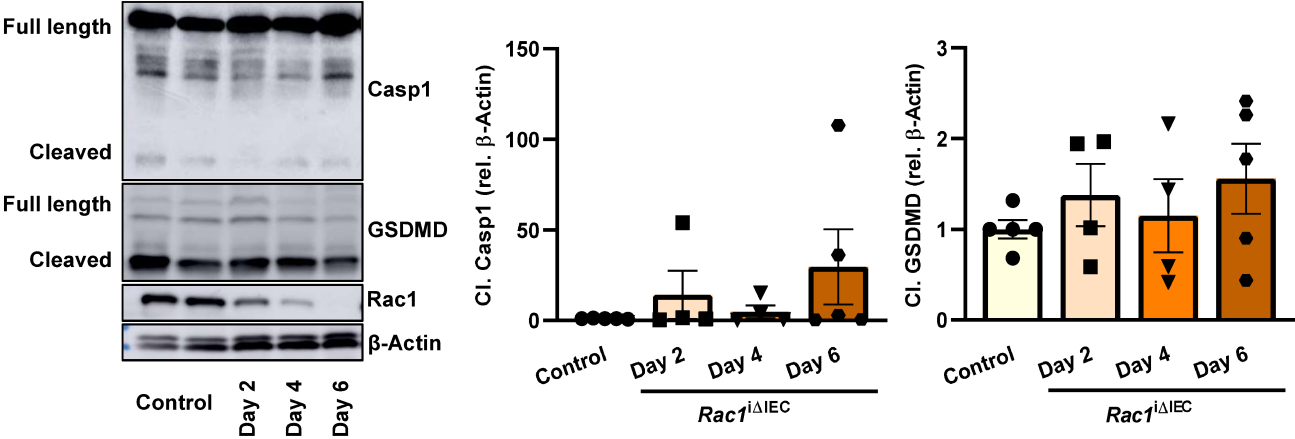

O

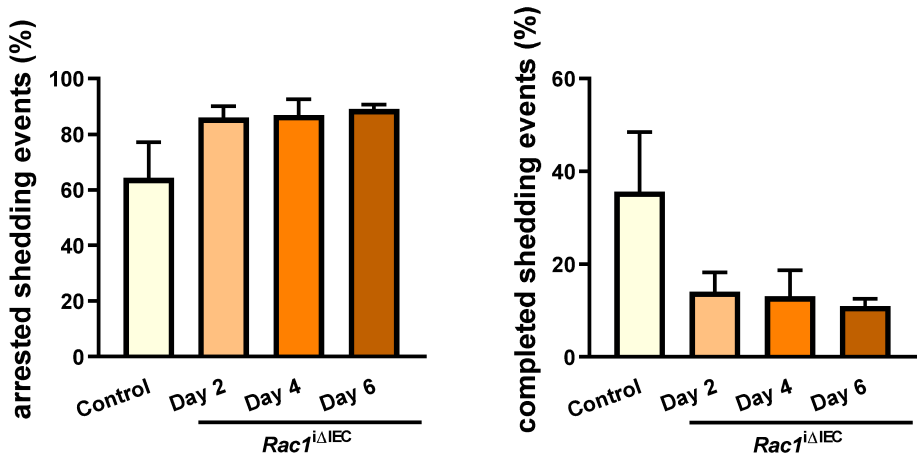

Suppl. Fig. 5: Rac1 conditional knock-out mice

P

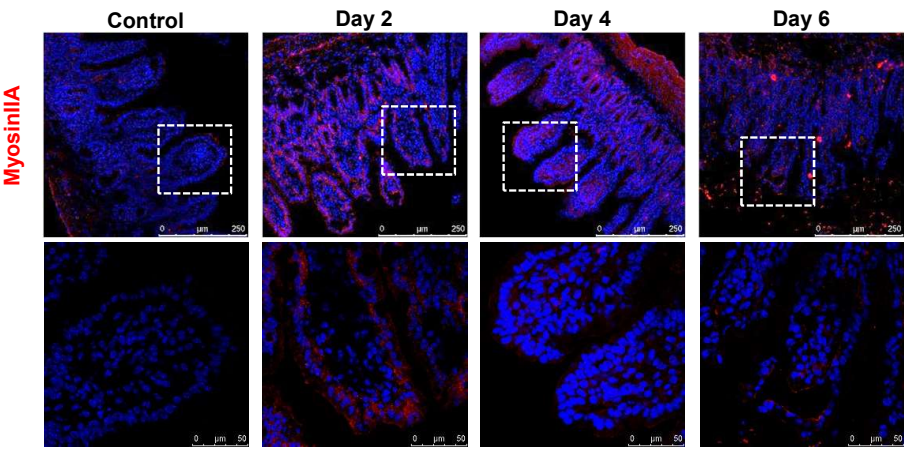

Q

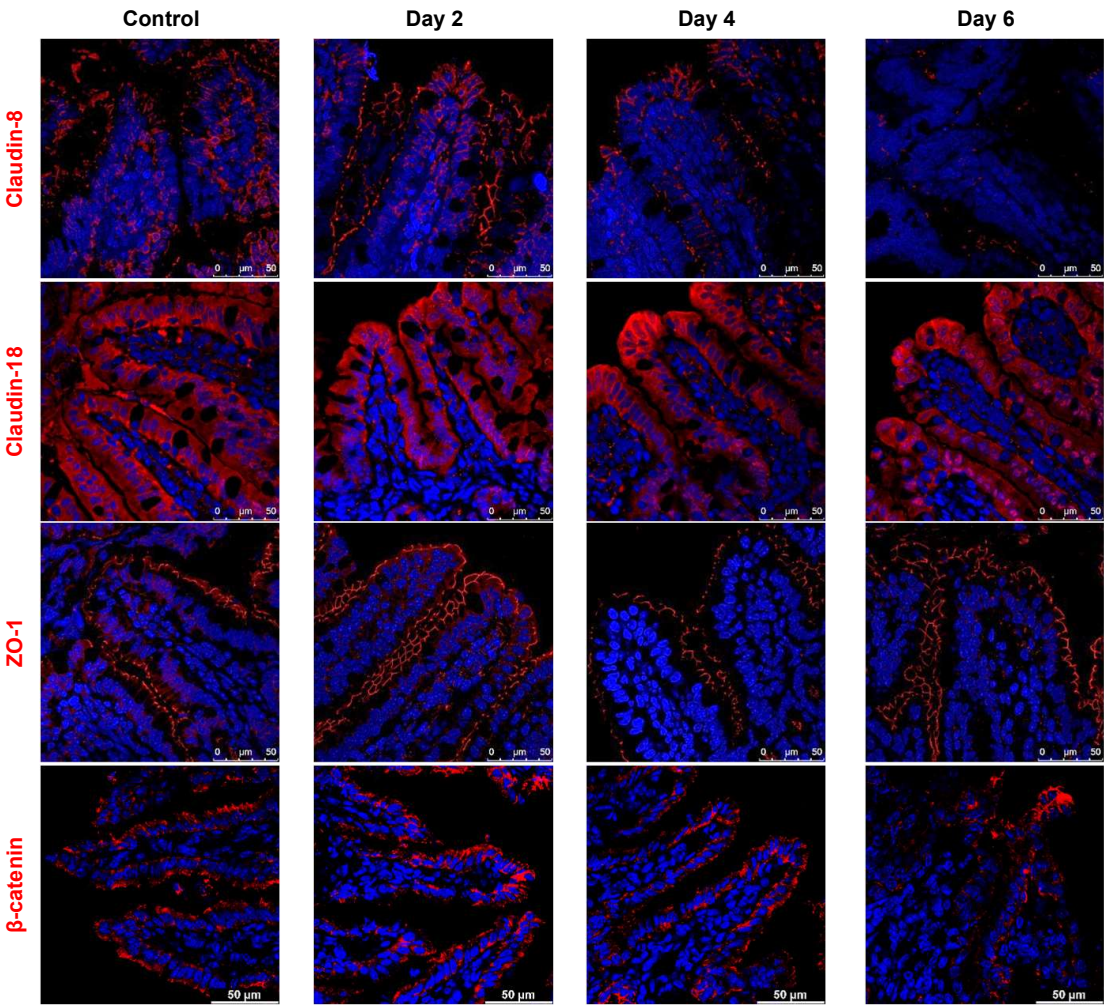

Suppl. Fig. 5: Rac1 conditional knock-out mice

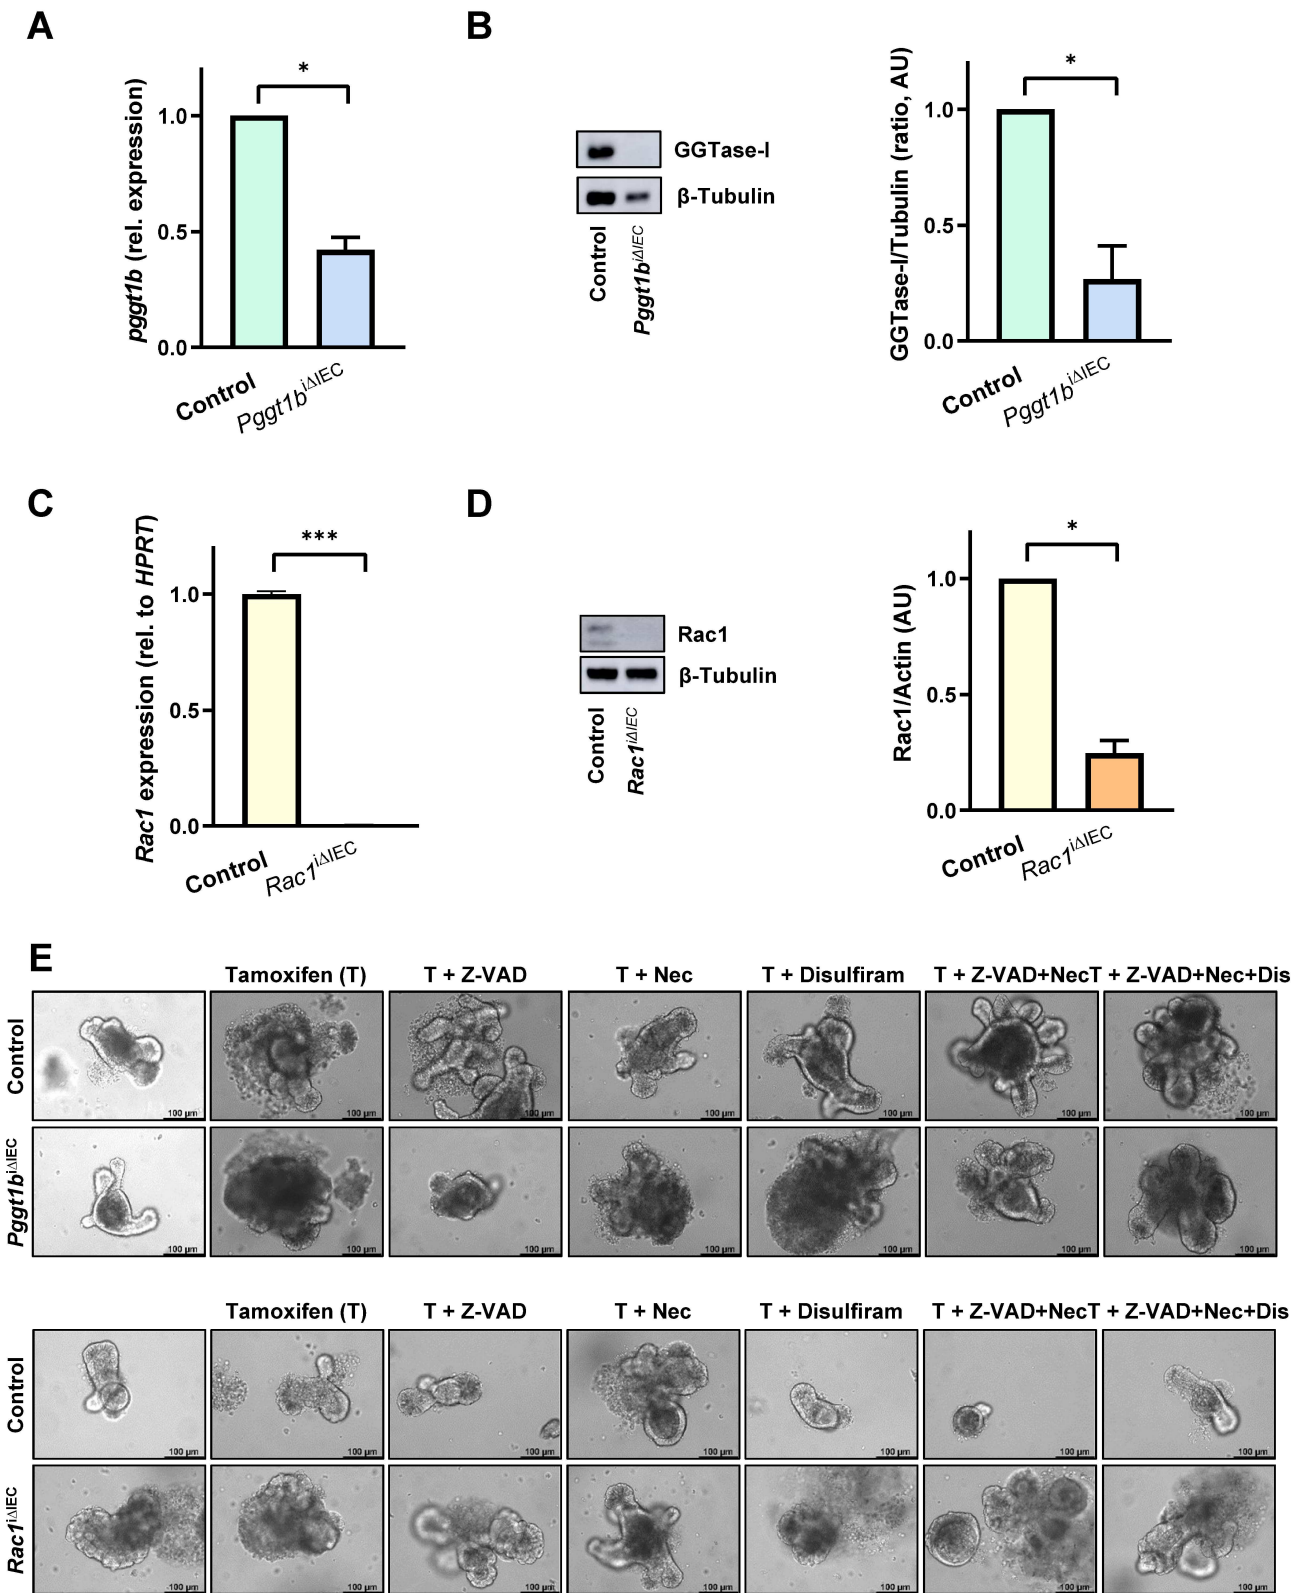

Suppl. Fig. 6: Organoids



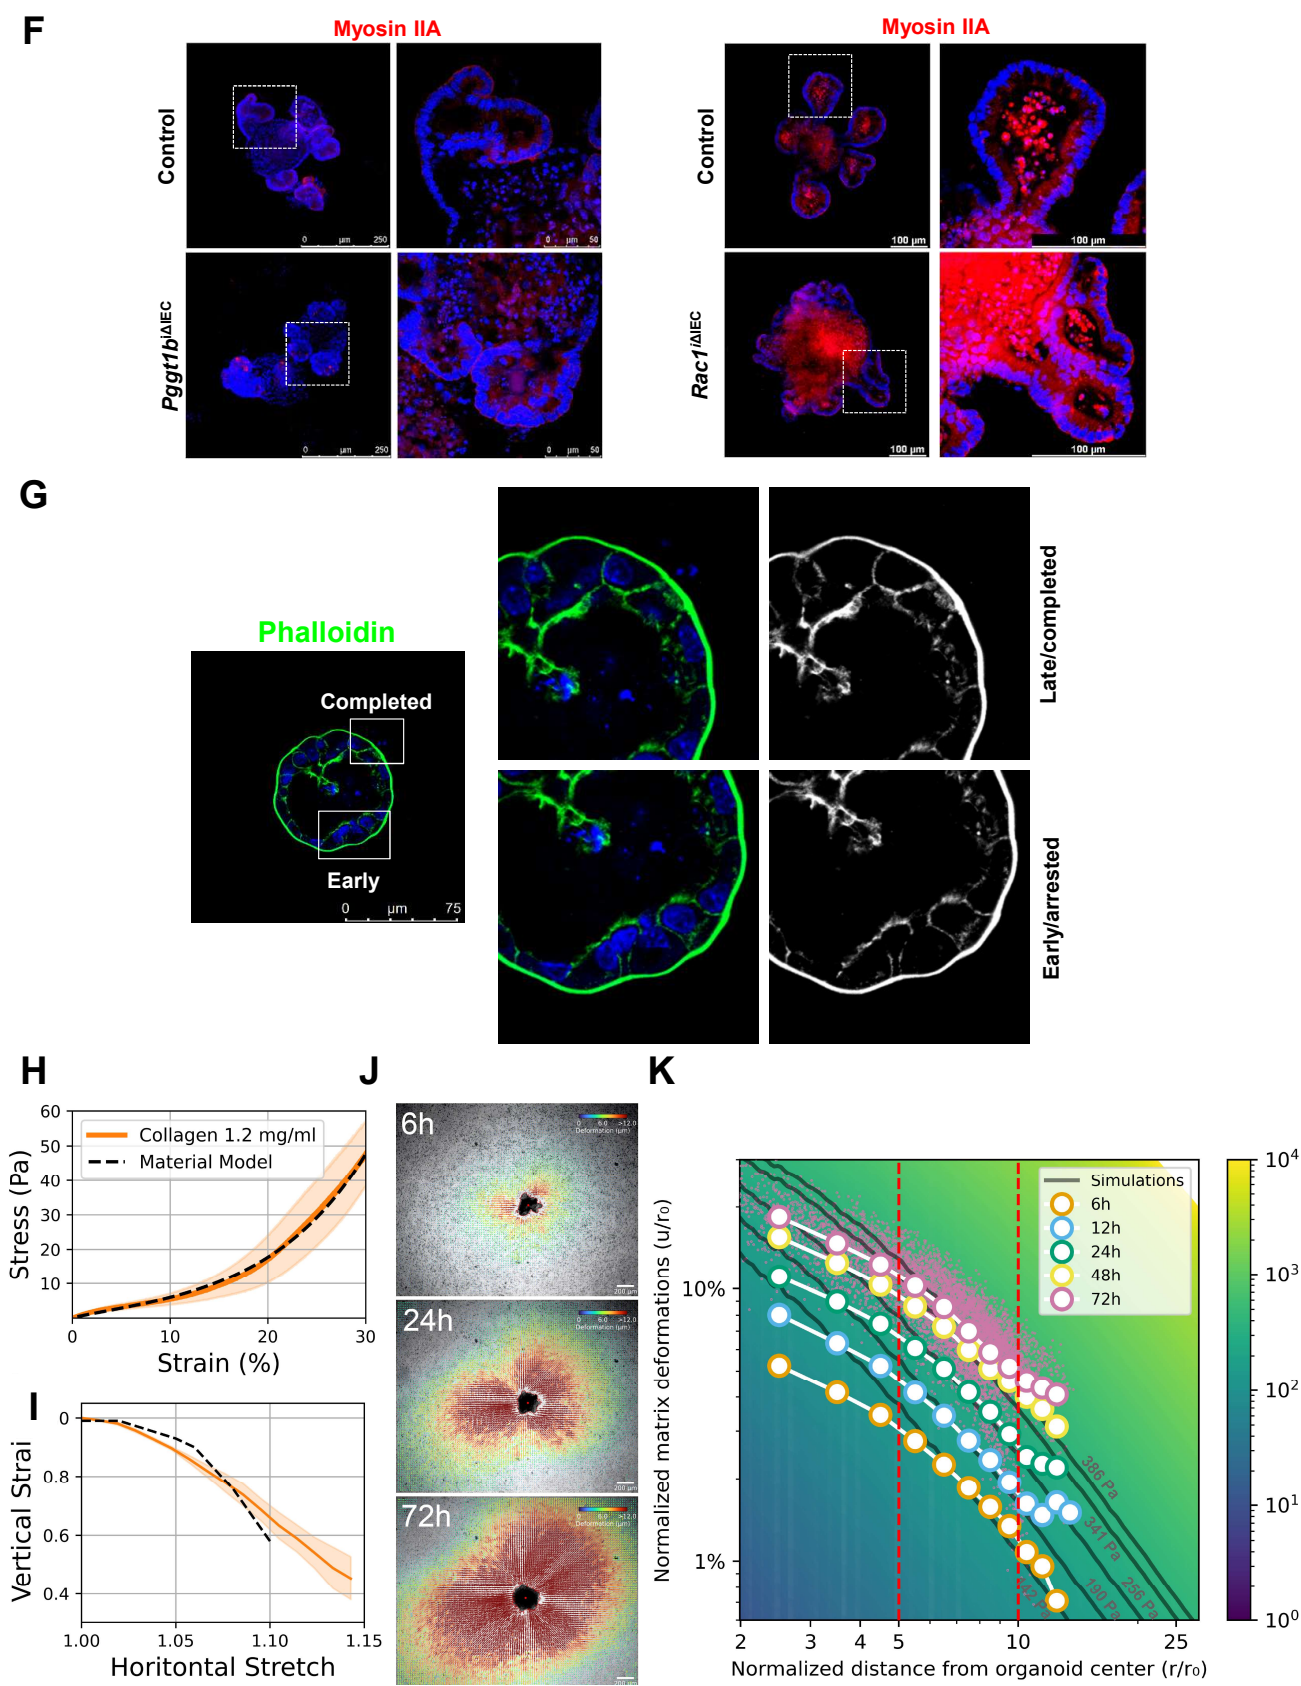

Suppl. Fig. 6: Organoids

L

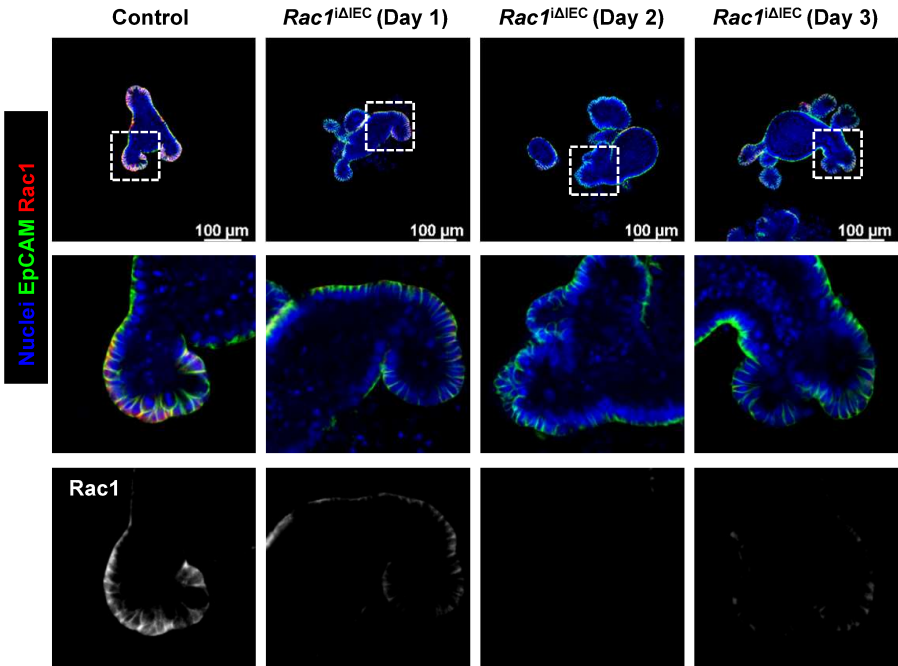

M

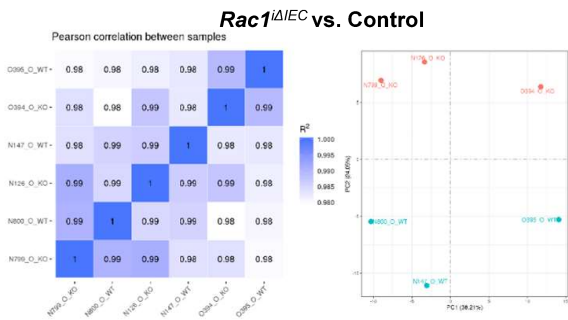

N

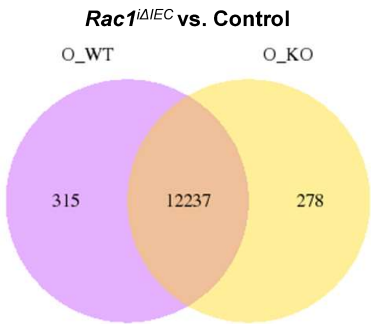

O

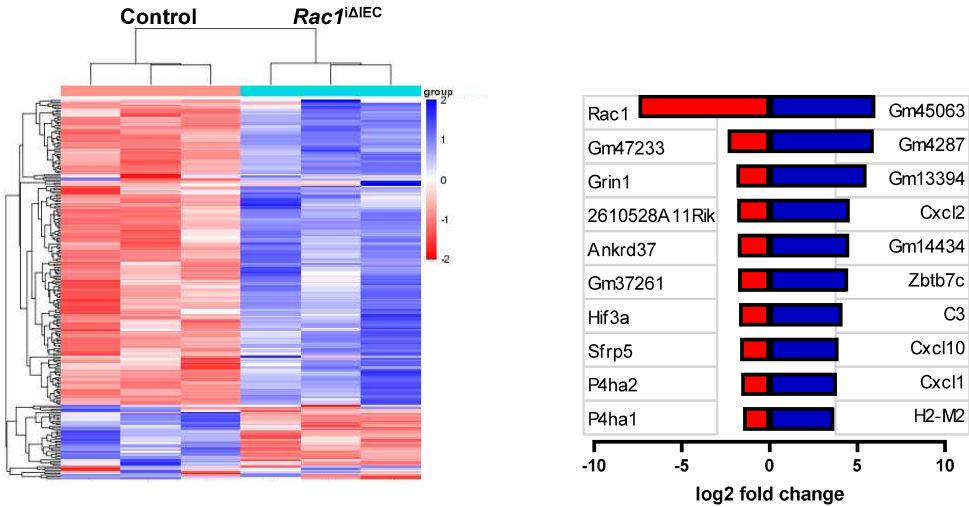

Suppl. Fig. 6: Organoids



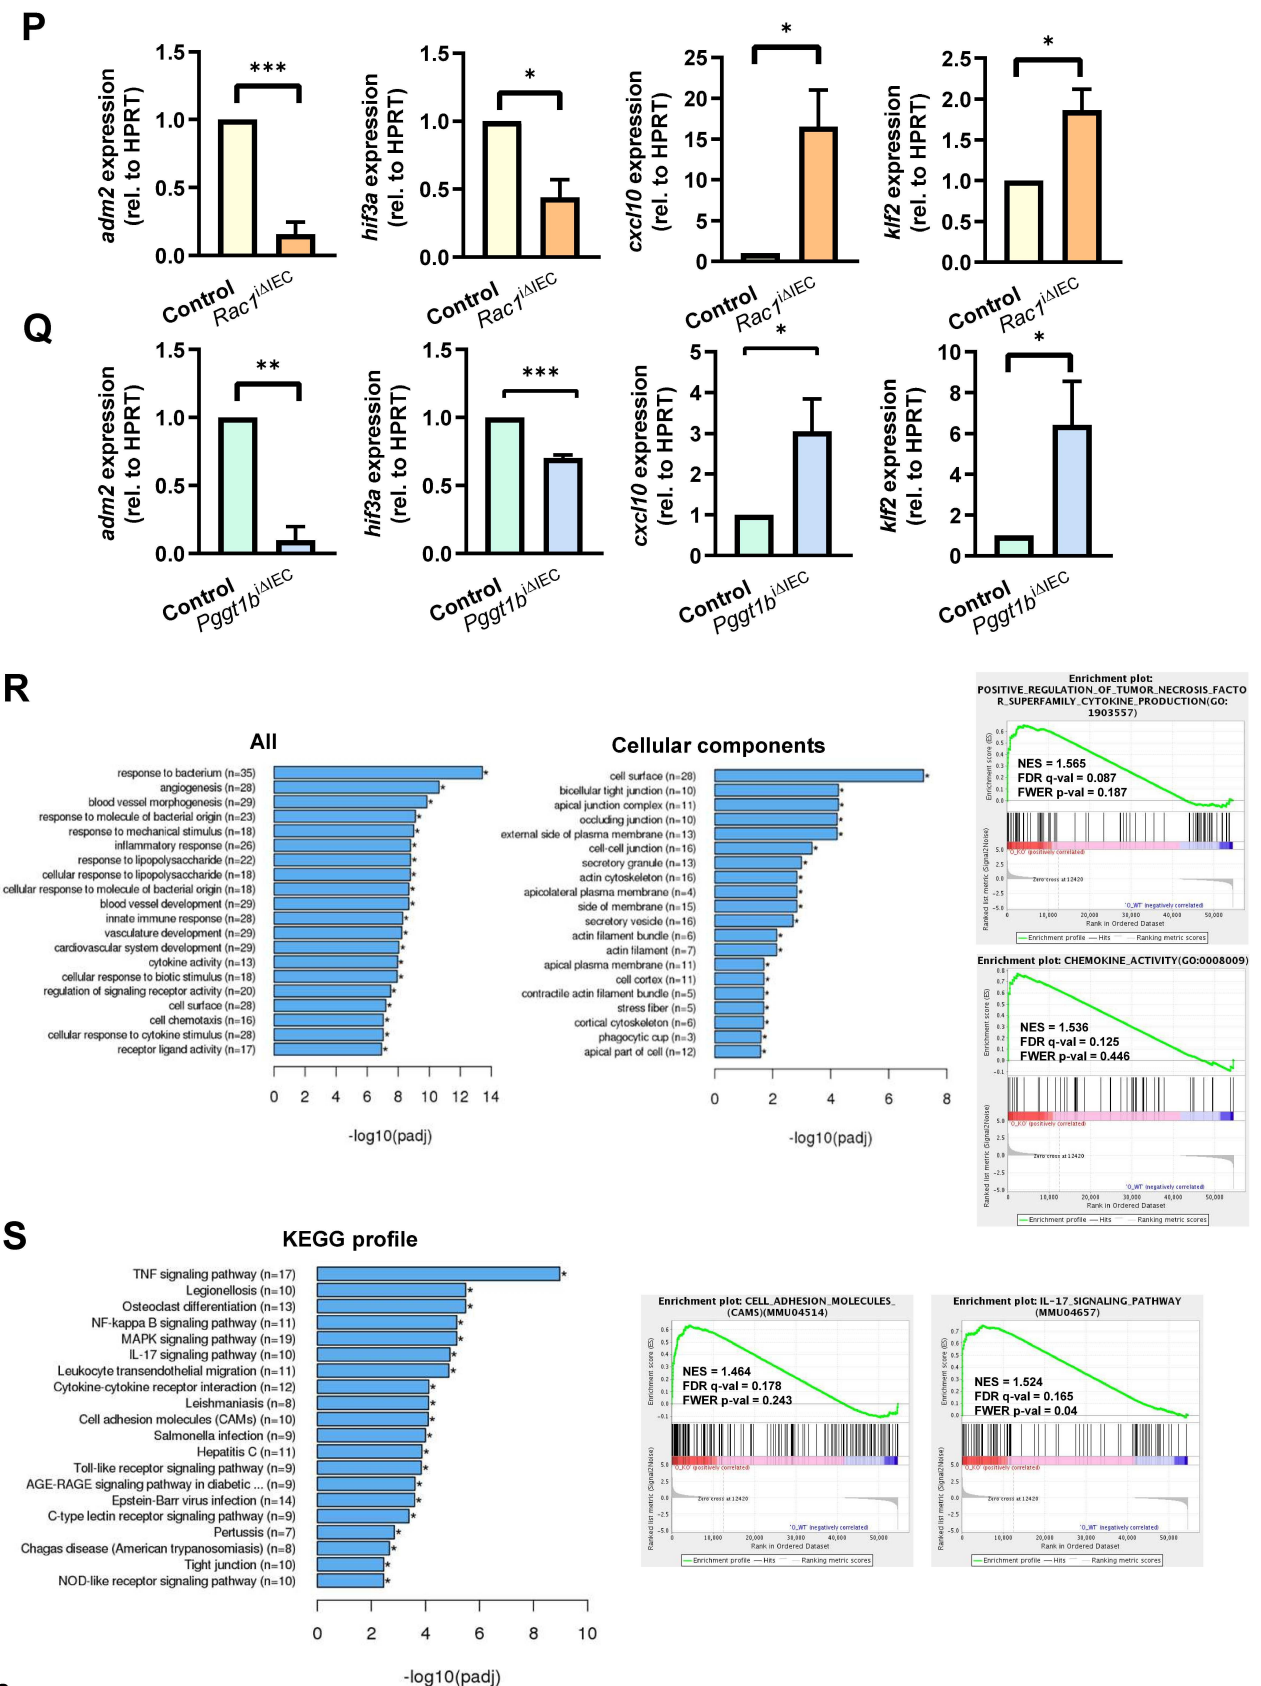

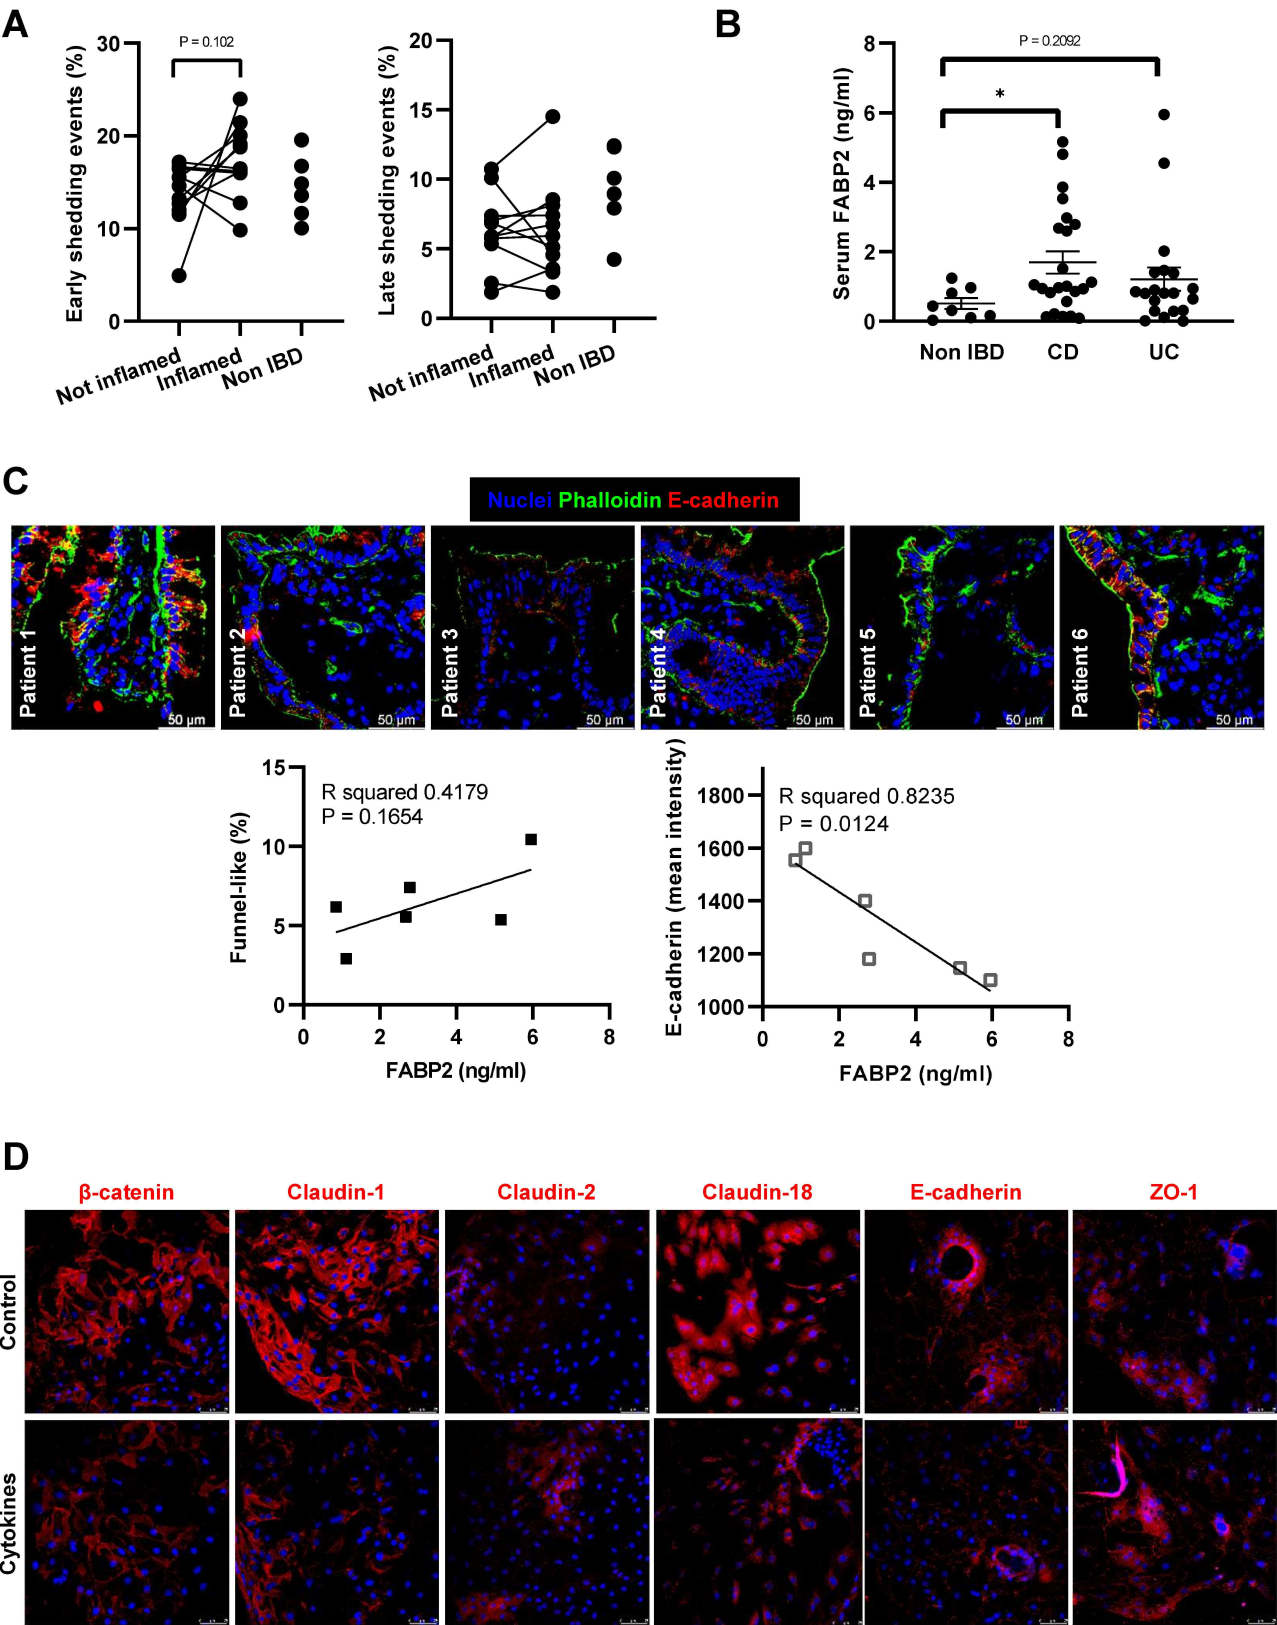

Suppl. Fig. 7: Cell shedding in IBD



E

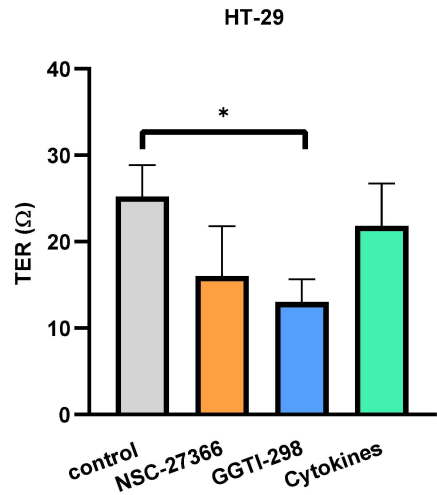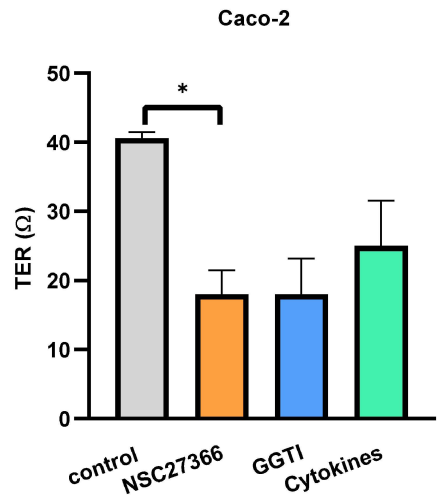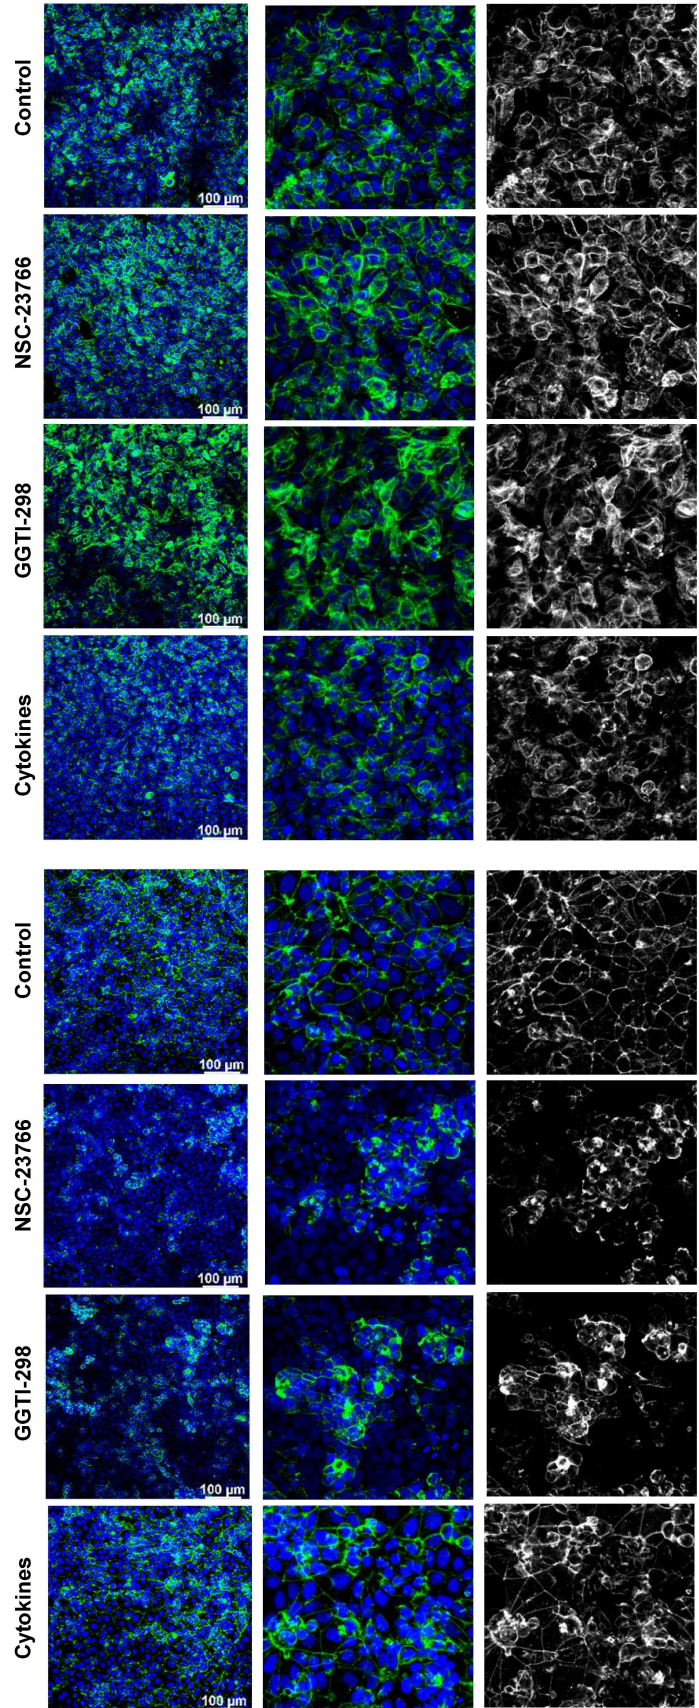

Suppl. Fig. 7: Cell shedding in IBD

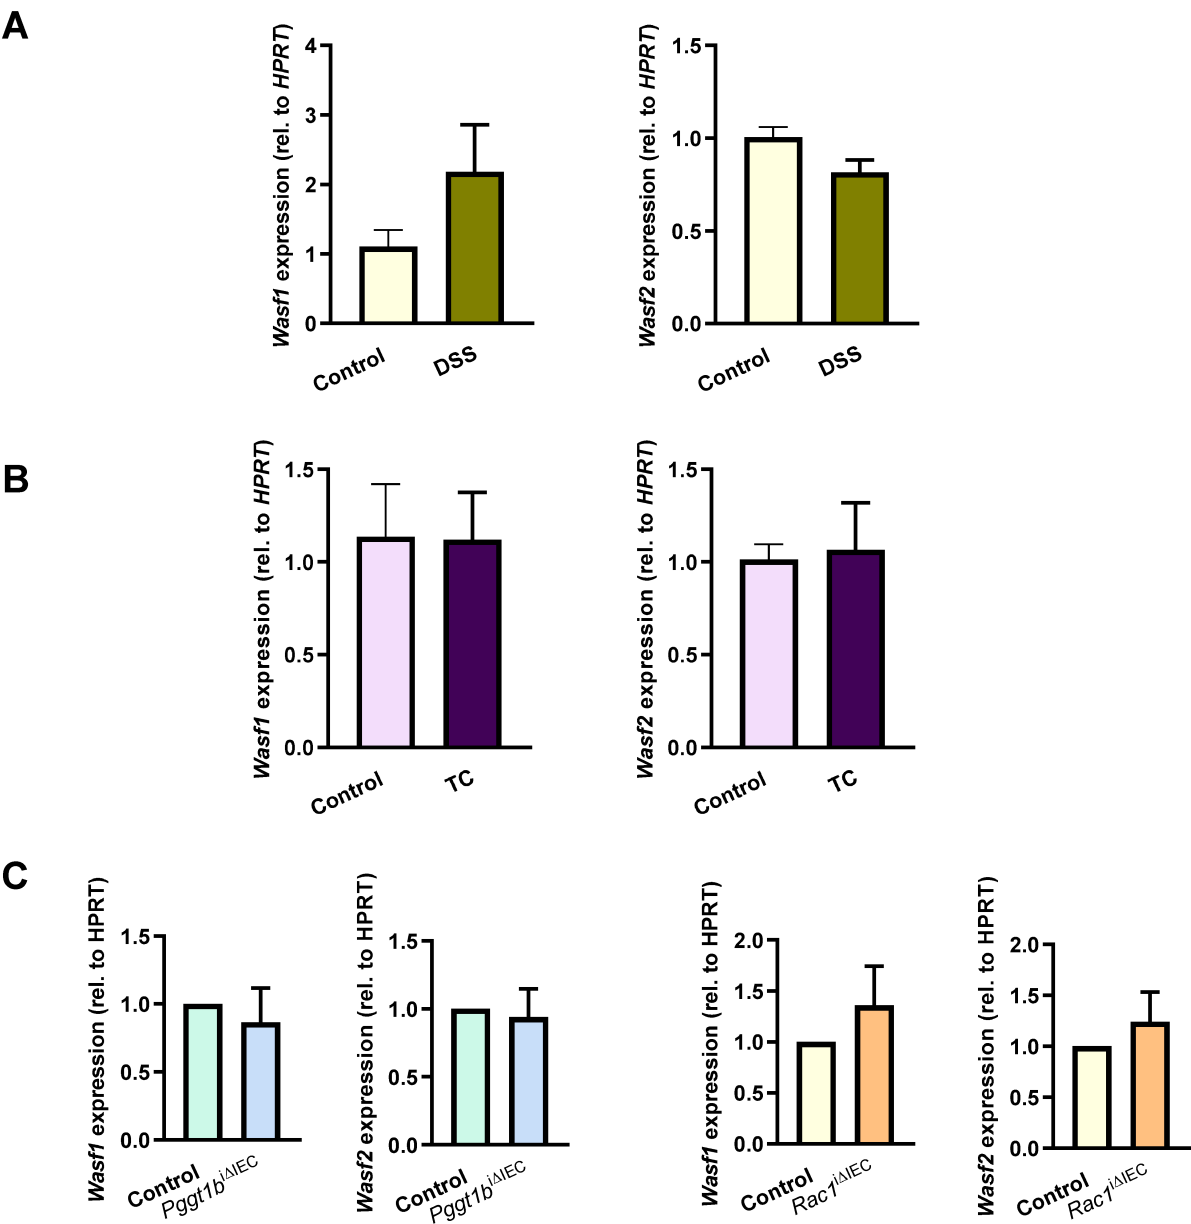

Supplementay Figure 8: Human RAC1
